# Supplementary material for: The impact of the Deepwater Horizon blowout on historic shipwreck-associated sediment microbiomes in the northern Gulf of Mexico
Source: PubMed Central journal article supplement (PMC6023898; doi:10.1038/s41598-018-27350-z), 2018-06-28
Supplement: 41598_2018_27350_MOESM1_ESM.pdf [file 41598_2018_27350_MOESM1_ESM.pdf]

## Supplementary Information

The impact of the *Deepwater Horizon* blowout on historic shipwreck-associated sediment microbiomes in the northern Gulf of Mexico

Leila J. Hamdan<sup>1\*</sup>, Jennifer L. Salerno<sup>2</sup>, Allen Reed<sup>3</sup>, Samantha B. Joye<sup>4</sup>, and Melanie Damour<sup>5</sup>

<sup>1</sup>University of Southern Mississippi, Ocean Springs, MS 39564

<sup>2</sup>George Mason University, Manassas, VA 20110

<sup>3</sup>U.S. Naval Research Laboratory, Stennis Space Center, MS, 39529

<sup>4</sup>University of Georgia, Athens, GA, 30602

<sup>5</sup>Bureau of Ocean Energy Management, New Orleans, LA, 70123

\*Corresponding author: Leila J. Hamdan, University of Southern Mississippi, School of Ocean Science and Technology, Division of Coastal Sciences, Ocean Springs, MS, USA. e-mail: leila.hamdan@usm.edu. Tel: (228) 818-8011

## Materials and Methods

### *Sample Collection*

Sediment was collected during two expeditions on board R/V *Pelican*: PE14-15 and PE15-02 in March and July 2014, respectively, as part of the Gulf of Mexico Shipwreck Corrosion, Hydrocarbon Exposure, Microbiology, and Archaeology (GOM-SCHEMA) project (<https://www.boem.gov/GOM-SCHEMA>) using the *Global Explorer* remotely operated vehicle (GEX-ROV - Deep Sea Systems International, <http://www.deepseasystems.com>). Prior to sample collection, a visual survey of each shipwreck was performed to update archaeological site plans and identify suitable areas for sediment sampling that are devoid of archaeological materials. During surveys, no visual evidence of shipwreck damage from NRDA or other sampling efforts was observed.

A requirement for sampling was the ability to obtain sediment within 2 m of each shipwreck without damaging the archaeological sites, including cultural materials within their associated debris fields. Using an Orion 7-function manipulator arm, *Jason*-style push corers obtained 2.5 in. inner diameter (ID) sediment cores within 2 m of each wreck, and away from the primary wreck sites, and debris fields, (100–200 m distance) (Figure 2). Project archaeologists and archaeological site plans were consulted to determine sampling locations. Replicate cores for various analyses were obtained. Cores were extruded into 2.5 in. ID tubes and sampled destructively at 2 cm resolution. Sediment for genetic analysis was placed into sterile, PCR clean tubes, immediately frozen at -20°C, and stored at -80°C. Samples for gravimetric porosity were collected in whirl-pack bags and stored refrigerated. Samples for hydrocarbon analysis and bulk organic carbon analysis were placed in whirl-pack bags and stored at -20°C.

### *DNA extraction and sequencing of 16S rRNA gene amplicons*

Genomic DNA was extracted using a modification of the FastDNA™ protocol described elsewhere <sup>1</sup>. Total genomic DNA was quantified using the Qubit® 2.0 Fluorometric Quantitation system (Invitrogen, Carlsbad, CA, USA). Approximately 2 ng/μL of template was sent to the Integrated Microbiome Resource (IMR) facility at Dalhousie University (Halifax, Nova Scotia, Canada) for 16S rRNA gene amplification and sequencing. PCR amplifications were carried out in 50-μL reactions described by Comeau et al. <sup>2</sup>, using fusion primers B969F/BA1406 and A956F/A1401R to target the V6-V8 regions of the 16S rRNA gene for bacteria and archaea, respectively. PCR products were screened with an Invitrogen 96-well E-gel, and duplicates were pooled into a single plate, cleaned, and normalized. Samples were analyzed on an Illumina MiSeq platform to generate paired-end sequences.

Bioinformatics, sequence quality control and calculation of alpha diversity metrics were carried out in a pipeline generated with UPARSE <sup>3</sup> and Quantitative Insights into Microbial Ecology (QIIME) <sup>4</sup>. Shannon Diversity was calculated for both rarefied and un-rarefied datasets. UPARSE was used to merge paired-end sequences with a minimum merge length of 200 base pairs (bps) and a maximum difference of 32 bps in the overlap region (20% error rate). Merged sequences were quality filtered, discarding reads with a maximum number of expected errors >0.5 (based on Phred quality scores) <sup>5</sup>. Sequences were dereplicated, with unique sequences serving as OTUs; remaining sequences were assigned to OTUs based on greedy clustering and ≥97% sequence similarity. Chimeric sequences were removed and singletons were included in the library. A table containing the relative abundance of OTUs in each sample was generated and used for taxonomic identification and phylogenetic alignment using UCLUST and the GreenGenes reference database (v 13.8) <sup>6</sup>.

Bacterial 16S rRNA sequence data were also processed through Phylogenetic Investigation of Communities by Reconstruction of Unobserved States (PICRUSt 1.1.0) to predict metagenome functional content <sup>7</sup>. Sequences processed up to the dereplication step were run through the “pick closed reference” pipeline in QIIME. The OTU table was normalized by predicted 16S rRNA copy and through PICRUSt to predict trait abundances based on KEGG orthologs. KEGG predictions were collapsed into KEGG pathways (K3 level) and visualized using Statistical Analysis of Metagenomic Profiles (STAMP v2.1.3) <sup>8</sup>.

### *Sediment Physical Properties*

Sediment porosity was determined from the volume of the porewater and total volume as determined from wet and dry weights, and water and grain density. A PentaPycnometer, which uses a helium gas to fill a chamber of known size, was used to determine sediment volume and density. Sediment accumulation rates were determined using measurements of Pb-210 excess activity (Pb-210<sub>xs</sub>) at the Louisiana State University, Department of Geology. The top 10 cm below the seafloor (cmbsf) were evaluated. The sedimentation rate (S) was determined as

follows:  $S = \frac{\lambda(z)}{\ln \frac{A_0}{A_z}}$ , where  $\lambda$  is the decay constant for radionuclide Pb-210 ( $\ln 2/t_{1/2} = 0.03114 \text{ yr}^{-1}$ ),

which has a half-life ( $t_{1/2}$ ) of 22 years,  $z$  is the distance below the sediment from which  $A_0$  was determined,  $A_0$  is the excess activity of the radionuclide (Pb-210) in the sediment at the top interval, and  $A_z$  is the excess activity of Pb-210 at a distance  $z$  below  $A_0$ . In the case of Pb-210, Pb-210<sub>xs</sub> is measured as the total activity of Pb-210 (Pb-210<sub>tot</sub>) above that which is supported by activity from other related radionuclides.

### *Hydrocarbon Analyses*

Analyses were not conducted on Mardi Gras and Viosca Knoll samples, as they were not visited during the first GOM-SCHEMA cruise in March 2014 due to weather complications. All

glassware was washed, wrapped in foil, and combusted at 500°C for 4 hours to remove any lingering organic carbon. All non-combustible items, including PTFE stopcocks, metal tools, caps, syringes, and volumetric glassware, were all triple rinsed subsequently with methanol, DCM, and hexane, and allowed to dry before handling. Sediment samples were thawed over a 2–3-hour window at room temperature. Roughly 5–6 grams of thawed sediment was transferred into a 50 mL freshly combusted glass centrifuge tubes. The same amount of combusted sodium sulfate (i.e., 5–6 gram) was added to remove water in the sample. Then, sediment samples were extracted sequentially with two rounds of dichloromethane (DCM):methanol (9:1, 20 mL) and one round of hexane (20 mL). For each round of extraction, the sediment sample was placed in a horn ultrasonicator (XL-2000 Misonix Ultrasonic Liquid Processors, Newtown, CT, USA) for 20 minutes at the maximum setting. The 60 mL eluent from three extraction rounds were combined and reduced to about 5 mL by Buchi rotavapor (BUCHI R-210, BÜCHI Labortechnik AG, Switzerland). The reduced extracts were desulfurized by passing through an activated copper columns and then washed with 4M HCl (~ 10 mL), DI water (~ 10 mL), methanol (3 x 10 mL), DCM (3 x 10 mL), hexane (3 x 10 mL), sequentially. After desulfurization, extracts were dried by passing through columns, which were made in combusted Pasteur pipettes using a glass wool plug to retain the anhydrous sodium sulfate. The volumes of the extracts were reduced again to about 1 mL by a blowdown nitrogen flow. The extracts were transferred into the 2 mL combusted HPLC vials using 1 mL Hamilton syringe (Hamilton, Reno, NV), and the volume was recorded. The procedural blanks using combusted sand were extracted and carried through the extraction.

Hydrocarbons were analyzed using a LECO Pegasus 4D GCxGC-Time of Flight Mass Spectrometry (ToF-MS) system equipped with an electron ionization source. Briefly, the

Pegasus 4D system is comprised of a primary column (10m Rxi-5Sil, 0.25 mm ID x 0.25um df) and a secondary column (1m Rxi-17Sil, 0.15 mm ID x 0.15 m df). Leak and tune check procedures were performed daily or before sample injections to ensure leak-free and mass calibration. Perfluorotributylamine (PFTBA) was used as the mass calibration compound. All data analysis including automatic peak finding using mass spectral deconvolution were performed using the LECO ChromaTOF-HRT software (version 4.6). PAHs (TCL PAH mix, Supelco, Bellefonte, PA). Total petroleum hydrocarbons (BP surrogate oil) standards were prepared with serial diluted samples in DCM with known amounts, and used as references to quantify PAHs and total petroleum hydrocarbons concentrations in the extracts.

#### *Radiocarbon Analysis*

Prior to analysis, samples were treated with 10% HCl to remove carbonates, rinsed, freeze-dried, and ground. Samples were then analyzed for  $\Delta^{14}\text{C}$ . At the Center for Applied Isotope Studies (CAIS) at UGA, samples were combusted and cryogenically purified to generate clean  $\text{CO}_2$  <sup>9</sup> which were then prepared as graphite targets and analyzed by accelerator mass spectrometry. The purified  $\text{CO}_2$  gas was converted to a solid, graphitic carbon by reducing  $\text{CO}_2$  in the presence of hydrogen ( $\text{H}_2$ ) at 580°C in an evacuated, closed system in the presence of an iron catalyst. Iron also serves as thermal conductor and binder. Water produced during the reaction was absorbed by magnesium perchlorate. The delta notation ( $\Delta^{14}\text{C}$ ) is used to report the measured isotope distributions, as is normalizes the radiocarbon content to a  $\delta^{13}\text{C}$  value of  $-25\text{‰}$  and accounts for the time of collection. Samples generally contained  $\sim 1000 \mu\text{g}$  of carbon and the reproducibility was roughly 5%.

### *Statistical analyses*

PRIMER v. 6.1.13 (PRIMER-E Ltd.) was used for statistical analysis of microbiome structure<sup>10-12</sup>. Bray-Curtis dissimilarities were calculated from sequence abundance data without transformation. Non-metric multidimensional scaling (NMDS) ordination of Bray-Curtis dissimilarities was performed to yield a ‘best fit’ 2D graphical representation of similarities in sample microbiomes. Hierarchical clustering analysis (CLUSTER) was used to generate similarity dendrograms based on group average linkage. ANOSIM was used to identify differences in microbiomes between sample groups. SIMPER was run with a 90% cutoff and used to rank the percent contribution of individual phylotypes to within group similarity or between group differences.

### *References*

- 1 Hamdan, L. J. *et al.* Ocean currents shape the microbiome of Arctic marine sediments. *Isme Journal* **7**, 685-696, doi:10.1038/ismej.2012.143 (2013).
- 2 Comeau, A. M., Li, W. K., Tremblay, J. E., Carmack, E. C. & Lovejoy, C. Arctic Ocean microbial community structure before and after the 2007 record sea ice minimum. *Plos One* **6**, e27492, doi:10.1371/journal.pone.0027492 (2011).
- 3 Edgar, R. C. UPARSE: highly accurate OTU sequences from microbial amplicon reads. *Nat Methods* **10**, 996-998, doi:10.1038/nmeth.2604 (2013).
- 4 Caporaso, J. G. *et al.* QIIME allows analysis of high-throughput community sequencing data. *Nature Methods* **7**, 335-336, doi:10.1038/nmeth.f.303 (2010).
- 5 Edgar, R. C. & Flyvbjerg, H. Error filtering, pair assembly and error correction for next-generation sequencing reads. *Bioinformatics* **31**, 3476-3482, doi:10.1093/bioinformatics/btv401 (2015).
- 6 DeSantis, T. Z. *et al.* Greengenes, a chimera-checked 16S rRNA gene database and workbench compatible with ARB. *Applied and Environmental Microbiology* **72**, 5069-5072, doi:10.1128/Aem.03006-05 (2006).
- 7 Langille, M. G. *et al.* Predictive functional profiling of microbial communities using 16S rRNA marker gene sequences. *Nat Biotechnol* **31**, 814-821, doi:10.1038/nbt.2676 (2013).
- 8 Parks, D. H., Tyson, G. W., Hugenholtz, P. & Beiko, R. G. STAMP: statistical analysis of taxonomic and functional profiles. *Bioinformatics* **30**, 3123-3124, doi:10.1093/bioinformatics/btu494 (2014).

- 9 Chanton, J. *et al.* Using Natural Abundance Radiocarbon To Trace the Flux of Petrocarbon to the Seafloor Following the Deepwater Horizon Oil Spill. *Environ Sci Technol* **49**, 847-854, doi:10.1021/es5046524 (2015).
- 10 Anderson, M. J. & Walsh, D. C. I. PERMANOVA, ANOSIM, and the Mantel test in the face of heterogeneous dispersions: What null hypothesis are you testing? *Ecological Monographs* **83**, 557-574, doi:10.1890/12-2010.1 (2013).
- 11 Clarke, K. R. & Warwick, R. M. *Change in marine communities: An approach to statistical analysis and interpretation, 2nd Ed., PRIMER-E Ltd.,* . (Plymouth Marine Laboratory, UK., 2001).
- 12 *Change in marine communities: An approach to statistical analysis and interpretation v. 2* (Plymouth Marine Laboratories, 2006).

### Supplementary Figure Legends

Figure S1. Comparison of bacterial community composition in push cores samples collected within 2 m of seven shipwreck sites during PE14-15 (March 2014) and PE15-02 (July 2014) and samples collected away from the wreck site during July 2014. Data for each site are displayed as depth profiles in cm below seafloor (cmbsf). Class level relative sequence abundance for all major classes (representing greater than 1% of total population) are displayed.

Figure S2. Comparison of archaeal community composition in push cores samples collected within 2 m of seven shipwreck sites during PE14-15 (March 2014) and PE15-02 (July 2014) and samples collected away from the wreck site during July 2014. Data for each site are displayed as depth profiles in cm below seafloor (cmbsf). Class level relative sequence abundance for all major classes (representing greater than 1% of total population) are displayed.

Figure S3. PICRUSt predicted metagenome contributions identifying the proportion of sequences with pathway predictions for naphthalene degradation, PAH degradation, and metabolism of xenobiotics by cytochrome P450 in surface sediments. Stars on boxes represent the average for each group (site)

Figure S4. Pb-210xs activity profiles for the upper 10 cm of sediment.



## Supplementary Figures

The impact of the *Deepwater Horizon* blowout on historic shipwreck-associated sediment microbiomes in the northern Gulf of Mexico

Leila J. Hamdan<sup>1\*</sup>, Jennifer L. Salerno<sup>2</sup>, Allen Reed<sup>3</sup>, Samantha B. Joye<sup>4</sup>, and Melanie Damour<sup>5</sup>

<sup>1</sup>University of Southern Mississippi, Ocean Springs, MS 39564

<sup>2</sup>George Mason University, Manassas, VA 20110

<sup>3</sup> U.S. Naval Research Laboratory, Stennis Space Center, MS, 39529

<sup>4</sup>University of Georgia, Athens, GA, 30602

<sup>5</sup>Bureau of Ocean Energy Management, New Orleans, LA, 70123

\*Corresponding author: Leila J. Hamdan, University of Southern Mississippi, School of Ocean Science and Technology, Division of Coastal Sciences, Ocean Springs, MS, USA. e-mail: leila.hamdan@usm.edu. Tel: (228) 818-8011

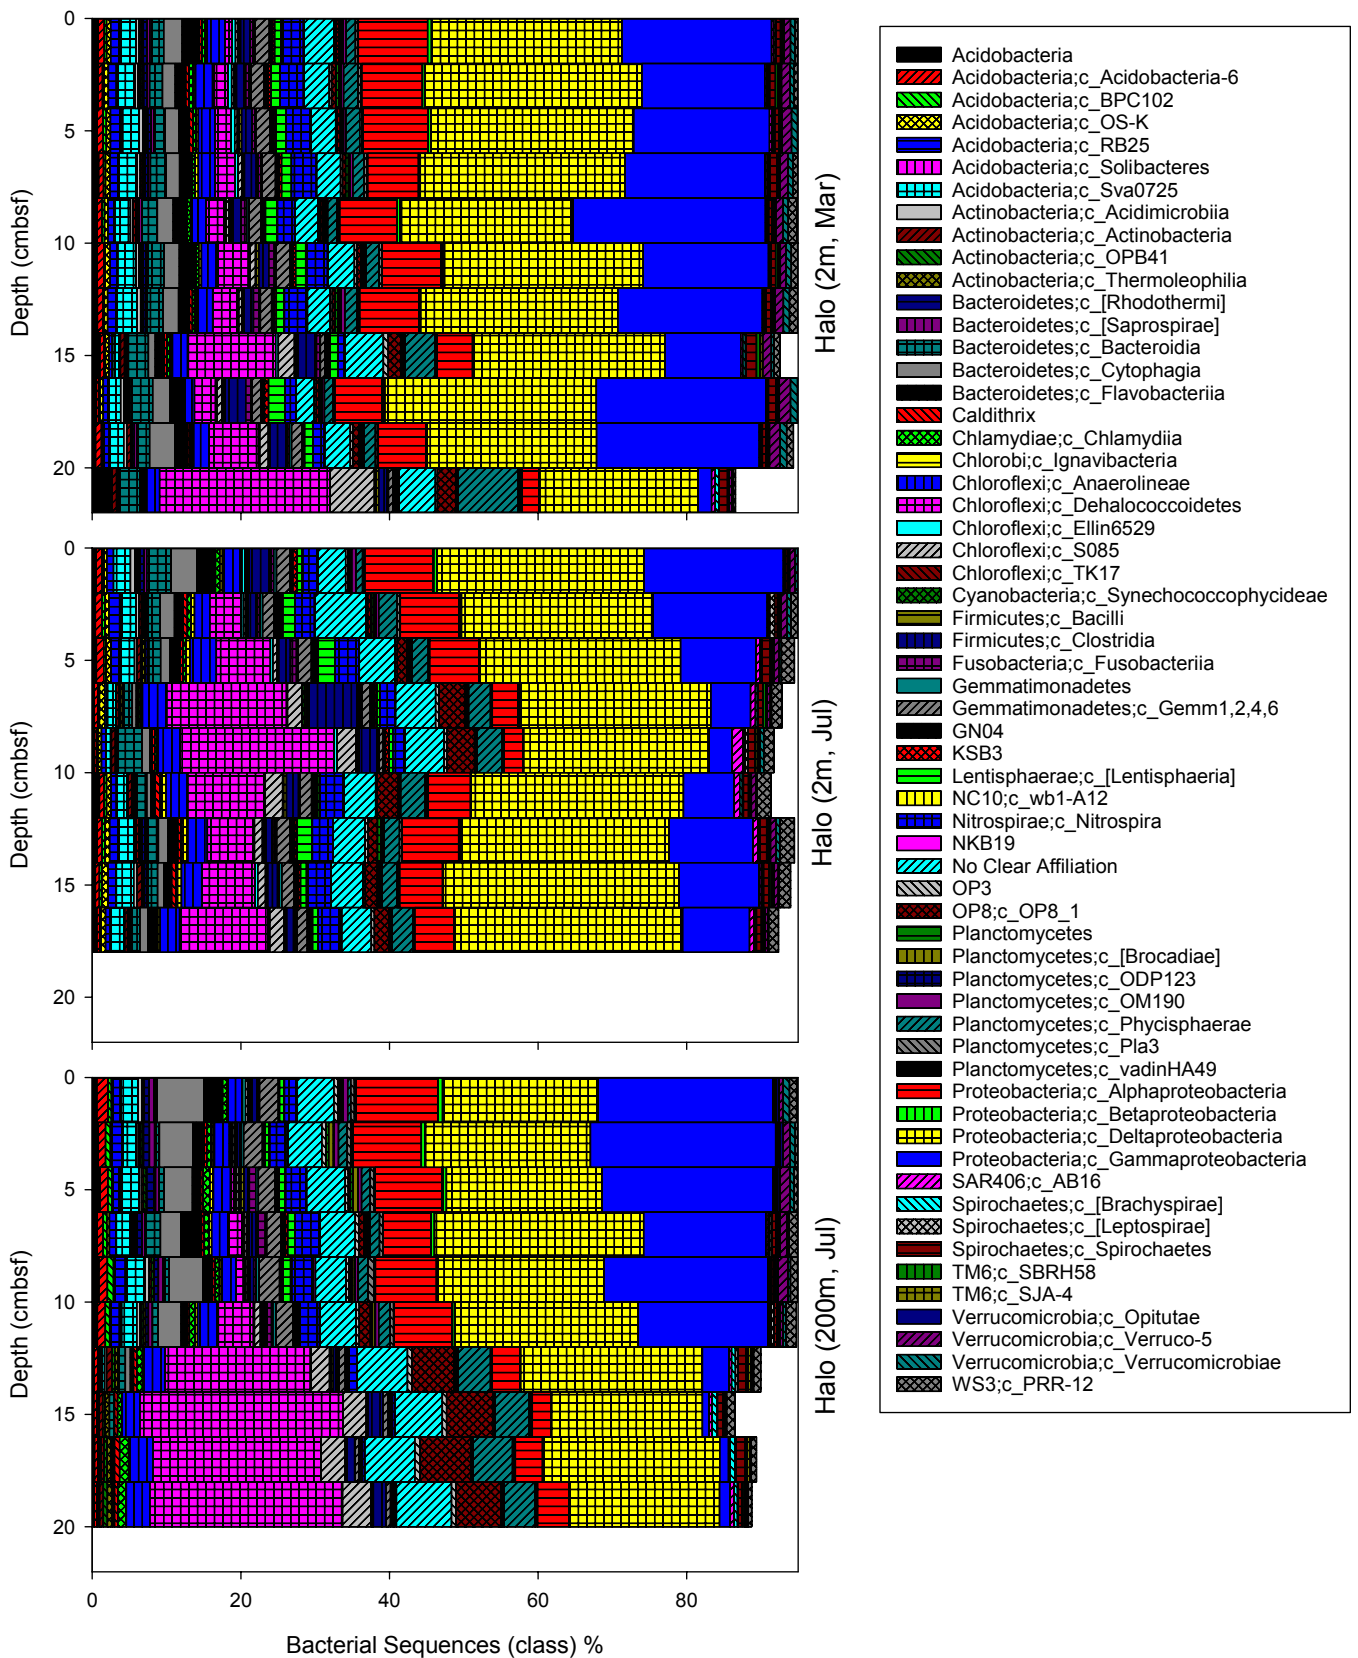

Figure S1.

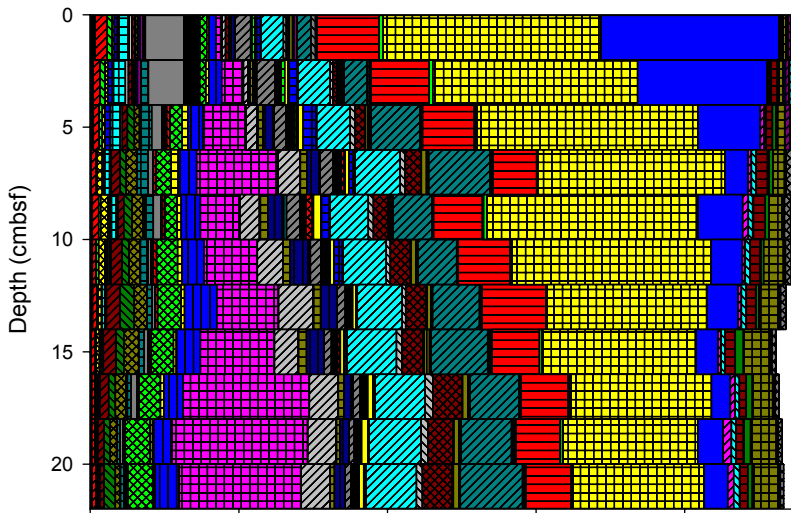

Ewing Bank (2m, Mar)

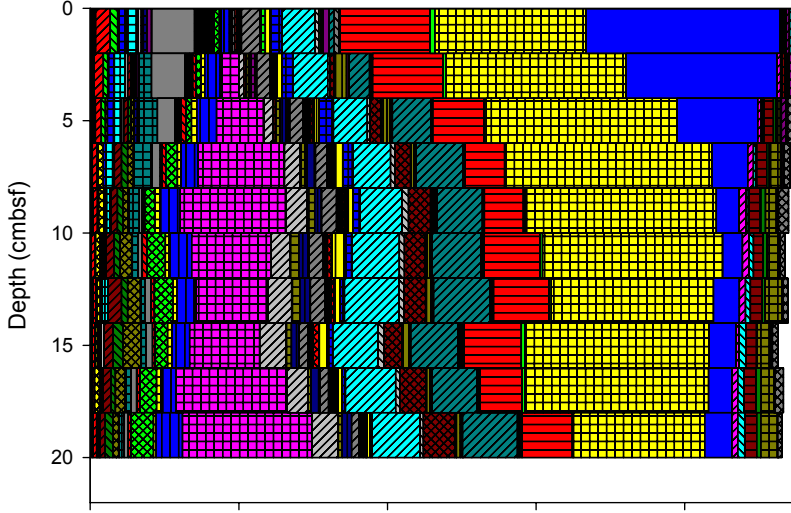

Ewing Bank (2m, Jul)

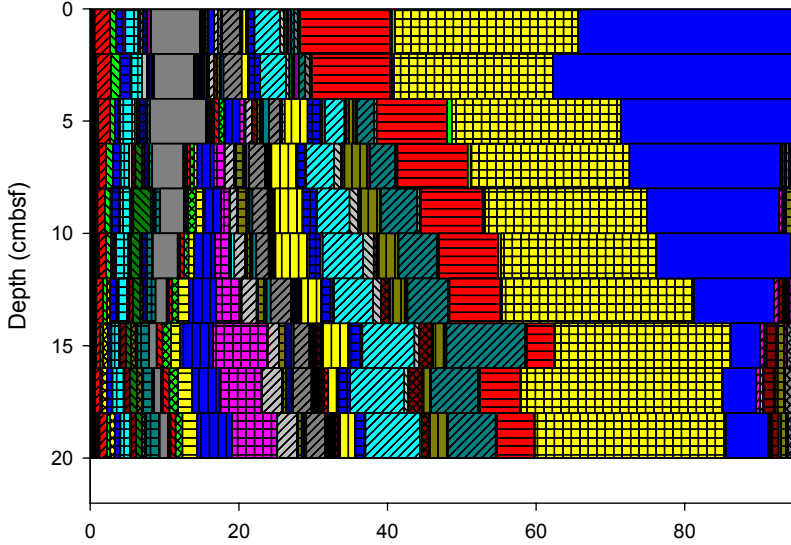

Ewing Bank (100m, Jul)

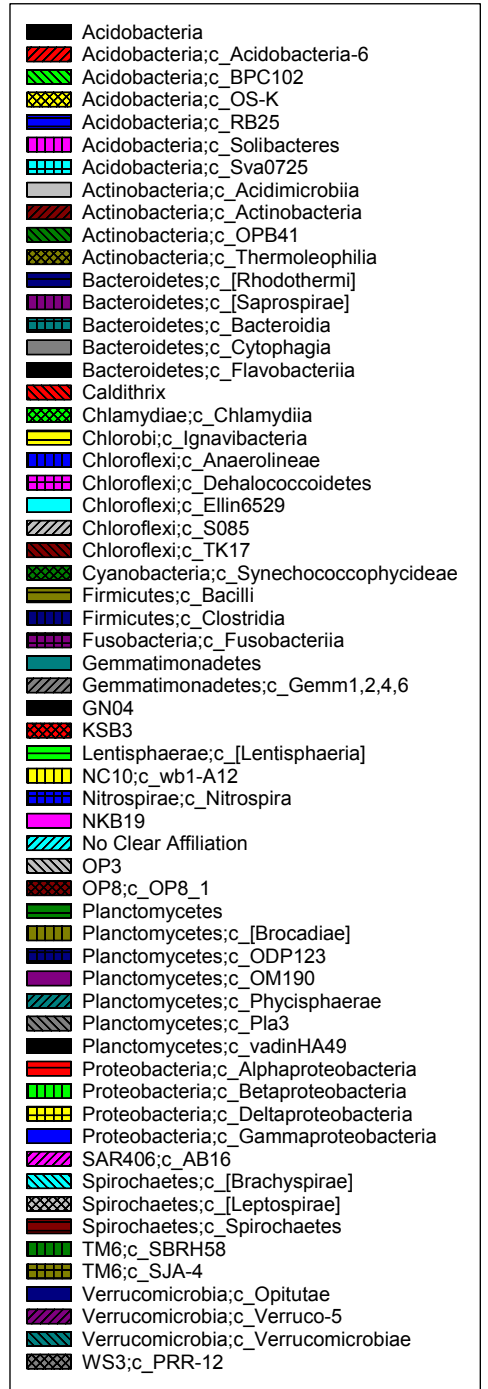

Bacterial Sequences (class) %

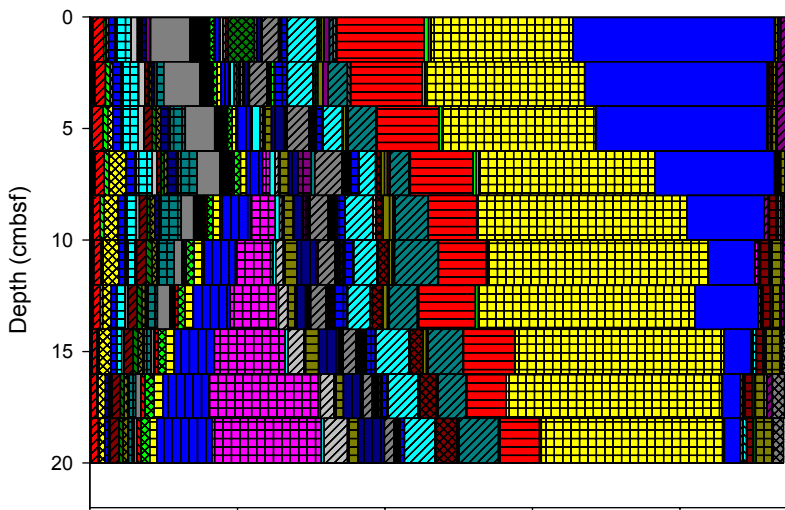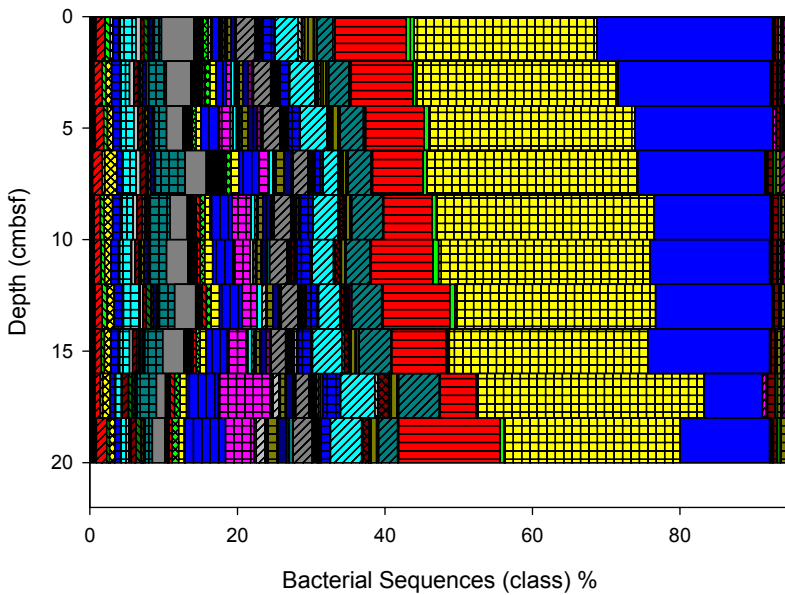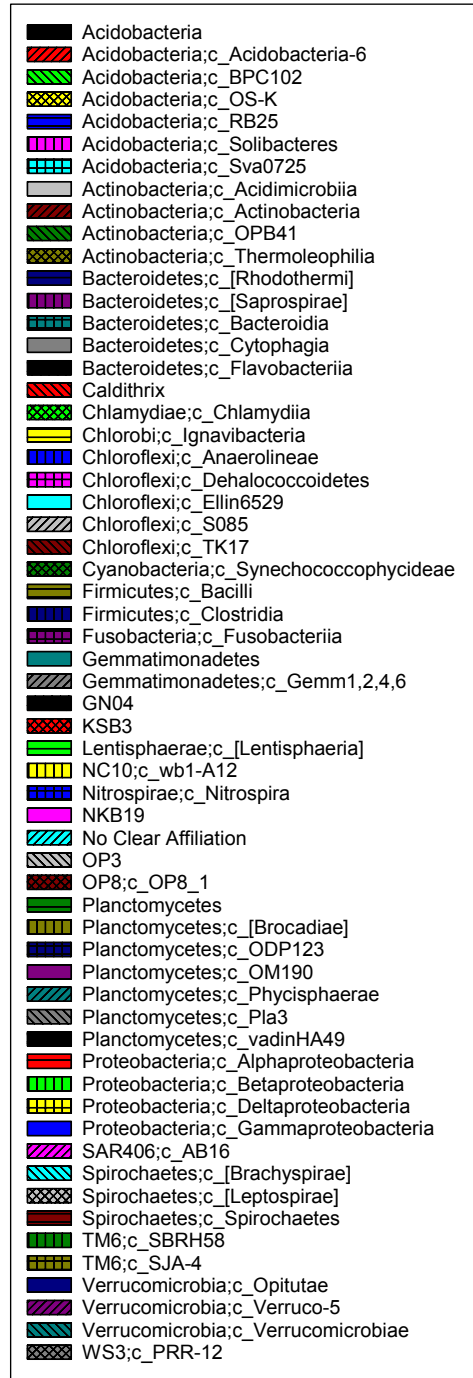

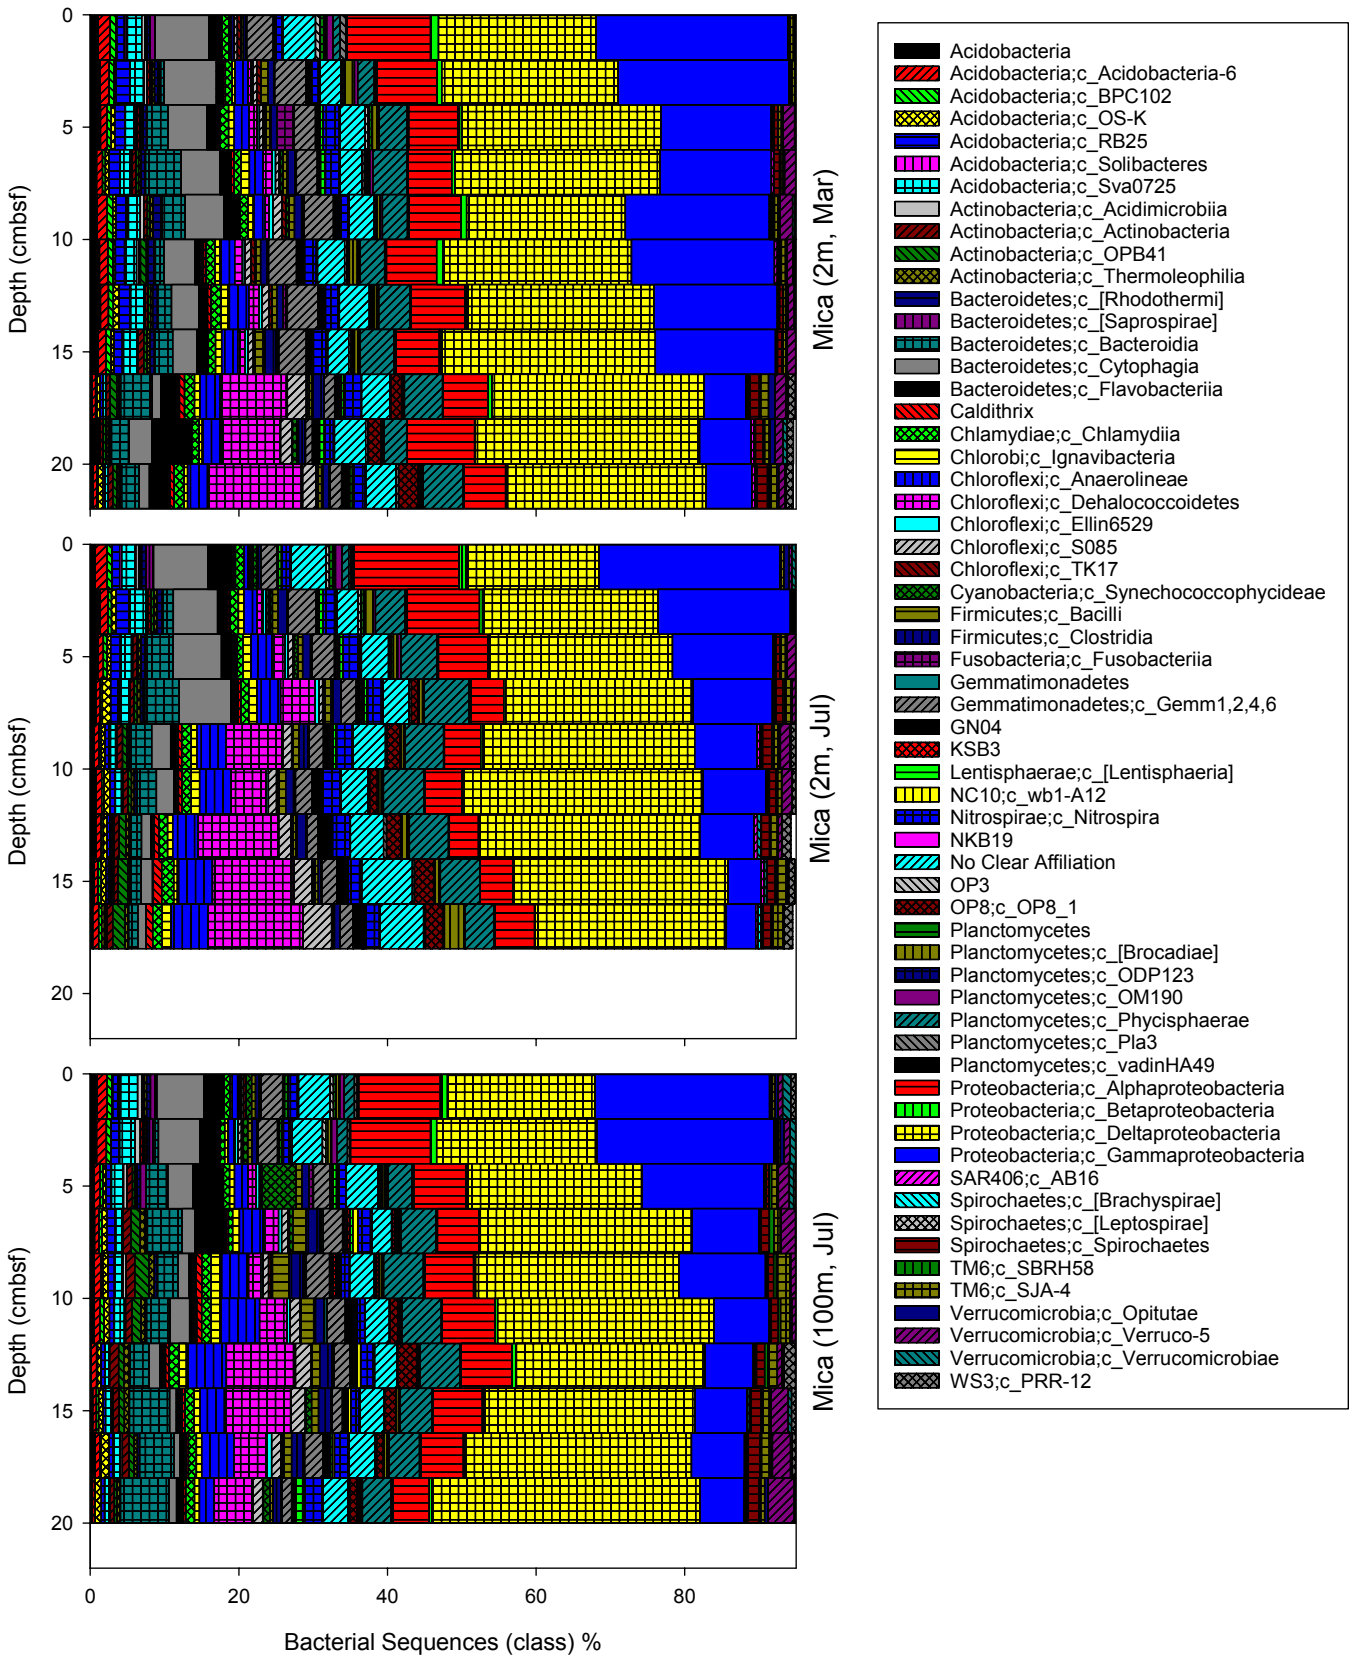

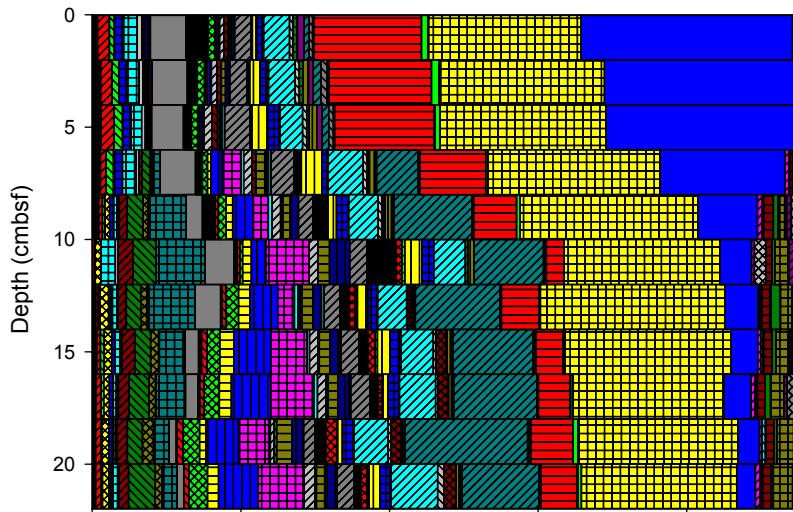

U-166 (2m, Mar)

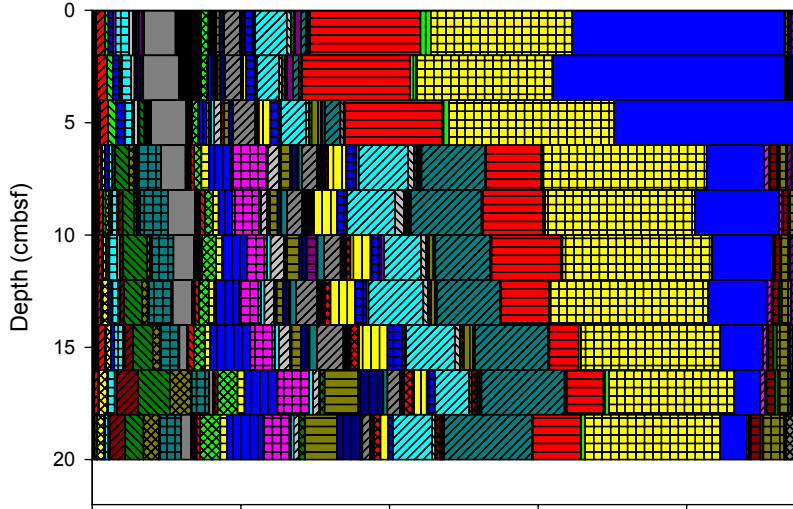

U-166 (2m, Jul)

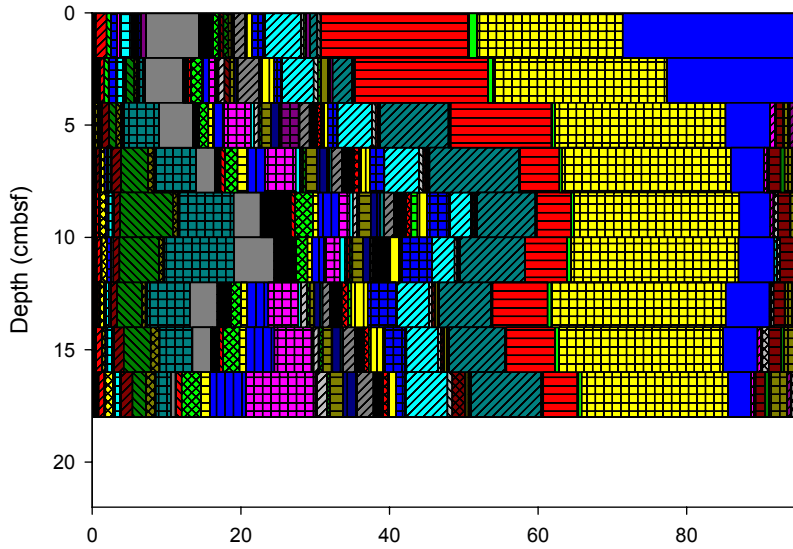

U-166 (200m, Jul)

- Acidobacteria
- Acidobacteria;c\_Acidobacteria-6
- Acidobacteria;c\_BPC102
- Acidobacteria;c\_OS-K
- Acidobacteria;c\_RB25
- Acidobacteria;c\_Solibacteres
- Acidobacteria;c\_Sva0725
- Actinobacteria;c\_Acidimicrobii
- Actinobacteria;c\_Actinobacteria
- Actinobacteria;c\_OPB41
- Actinobacteria;c\_Thermoleophilia
- Bacteroidetes;c\_[Rhodothermi]
- Bacteroidetes;c\_[Saprospirae]
- Bacteroidetes;c\_Bacteroidia
- Bacteroidetes;c\_Cytophagia
- Bacteroidetes;c\_Flavobacteria
- Caldithrix
- Chlamydiae;c\_Chlamydiia
- Chlorobi;c\_Ignavibacteria
- Chloroflexi;c\_Anaerolineae
- Chloroflexi;c\_Dehalococcoidetes
- Chloroflexi;c\_Ellin6529
- Chloroflexi;c\_S085
- Chloroflexi;c\_TK17
- Cyanobacteria;c\_Synechococophycideae
- Firmicutes;c\_Bacilli
- Firmicutes;c\_Clostridia
- Fusobacteria;c\_Fusobacteriia
- Gemmatimonadetes
- Gemmatimonadetes;c\_Gemm1,2,4,6
- GN04
- KSB3
- Lentisphaerae;c\_[Lentisphaeria]
- NC10;c\_wb1-A12
- Nitrospirae;c\_Nitrospira
- NKB19
- No Clear Affiliation
- OP3
- OP8;c\_OP8\_1
- Planctomycetes
- Planctomycetes;c\_[Brocadia]
- Planctomycetes;c\_ODP123
- Planctomycetes;c\_OM190
- Planctomycetes;c\_Phycisphaerae
- Planctomycetes;c\_Pla3
- Planctomycetes;c\_vadinHA49
- Proteobacteria;c\_Alphaproteobacteria
- Proteobacteria;c\_Betaproteobacteria
- Proteobacteria;c\_Deltaproteobacteria
- Proteobacteria;c\_Gammaproteobacteria
- SAR406;c\_AB16
- Spirochaetes;c\_[Brachyspirae]
- Spirochaetes;c\_[Leptospirae]
- Spirochaetes;c\_Spirochaetes
- TM6;c\_SBRH58
- TM6;c\_SJA-4
- Verrucomicrobia;c\_Opitutae
- Verrucomicrobia;c\_Verruco-5
- Verrucomicrobia;c\_Verrucomicrobiae
- WS3;c\_PRR-12

Bacterial Sequences (class) %

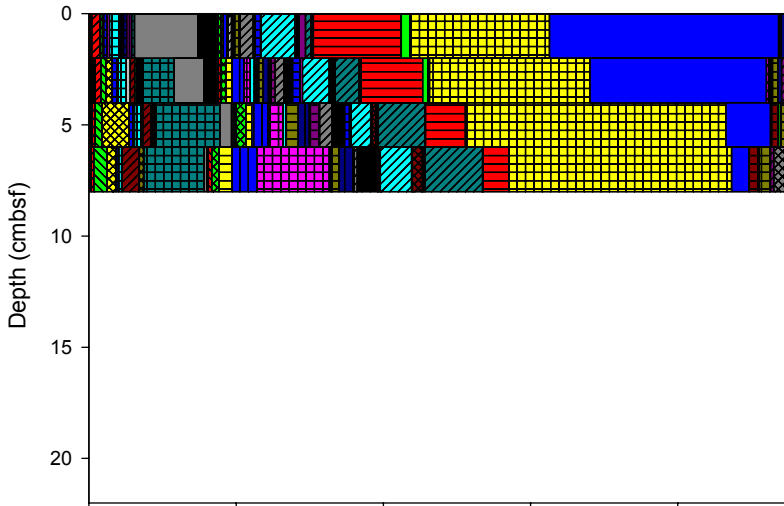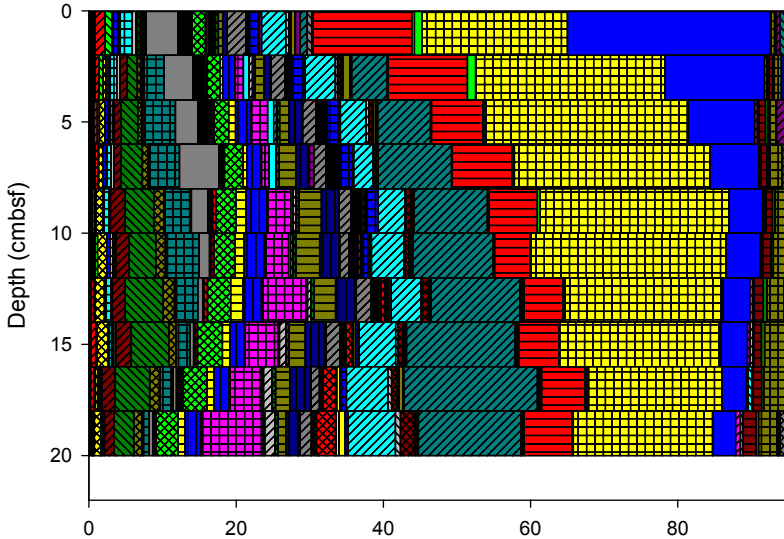

Bacterial Sequences (class) %

- Acidobacteria
- Acidobacteria;c\_Acidobacteria-6
- Acidobacteria;c\_BPC102
- Acidobacteria;c\_OS-K
- Acidobacteria;c\_RB25
- Acidobacteria;c\_Solibacteres
- Acidobacteria;c\_Sva0725
- Actinobacteria;c\_Acidimicrobiia
- Actinobacteria;c\_Actinobacteria
- Actinobacteria;c\_OPB41
- Actinobacteria;c\_Thermoleophila
- Bacteroidetes;c\_[Rhodothermi]
- Bacteroidetes;c\_[Saprospirae]
- Bacteroidetes;c\_Bacteroidia
- Bacteroidetes;c\_Cytophagia
- Bacteroidetes;c\_Flavobacteriia
- Caldithrix
- Chlamydiae;c\_Chlamydia
- Chlorobi;c\_Ignavibacteria
- Chloroflexi;c\_Anaerolineae
- Chloroflexi;c\_Dehalococcoidetes
- Chloroflexi;c\_Ellin6529
- Chloroflexi;c\_S085
- Chloroflexi;c\_TK17
- Cyanobacteria;c\_Synechococcophycideae
- Firmicutes;c\_Bacilli
- Firmicutes;c\_Clostridia
- Fusobacteria;c\_Fusobacteria
- Gemmatimonadetes
- Gemmatimonadetes;c\_Gemm1,2,4,6
- GN04
- KSB3
- Lentisphaerae;c\_[Lentisphaeria]
- NC10;c\_wb1-A12
- Nitrospirae;c\_Nitrospira
- NKB19
- No Clear Affiliation
- OP3
- OP8;c\_OP8\_1
- Planctomycetes
- Planctomycetes;c\_[Brocadia]
- Planctomycetes;c\_ODP123
- Planctomycetes;c\_OM190
- Planctomycetes;c\_Phycisphaerae
- Planctomycetes;c\_Pla3
- Planctomycetes;c\_vadinHA49
- Proteobacteria;c\_Alphaproteobacteria
- Proteobacteria;c\_Betaproteobacteria
- Proteobacteria;c\_Deltaproteobacteria
- Proteobacteria;c\_Gammaproteobacteria
- SAR406;c\_AB16
- Spirochaetes;c\_[Brachyspirae]
- Spirochaetes;c\_[Leptospirae]
- Spirochaetes;c\_Spirochaetes
- TM6;c\_SBRH58
- TM6;c\_SJA-4
- Verrucomicrobia;c\_Opitutae
- Verrucomicrobia;c\_Verruco-5
- Verrucomicrobia;c\_Verrucomicrobiae
- WS3;c\_PRR-12

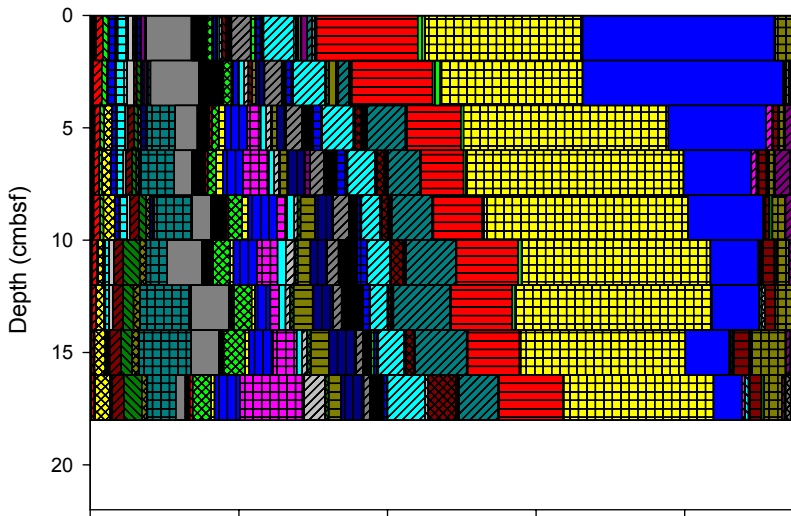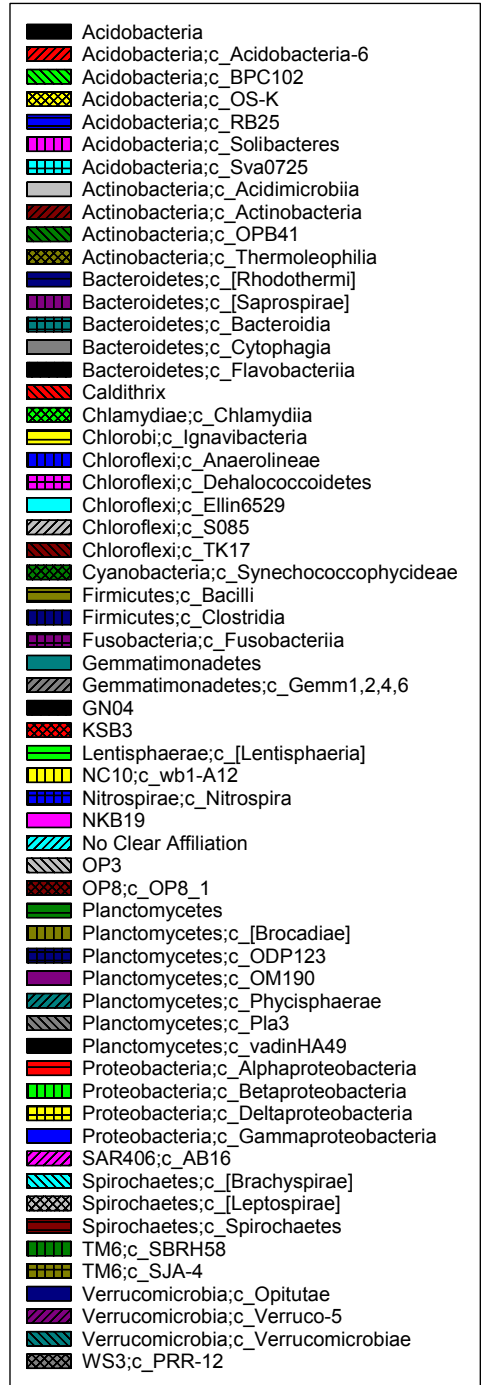



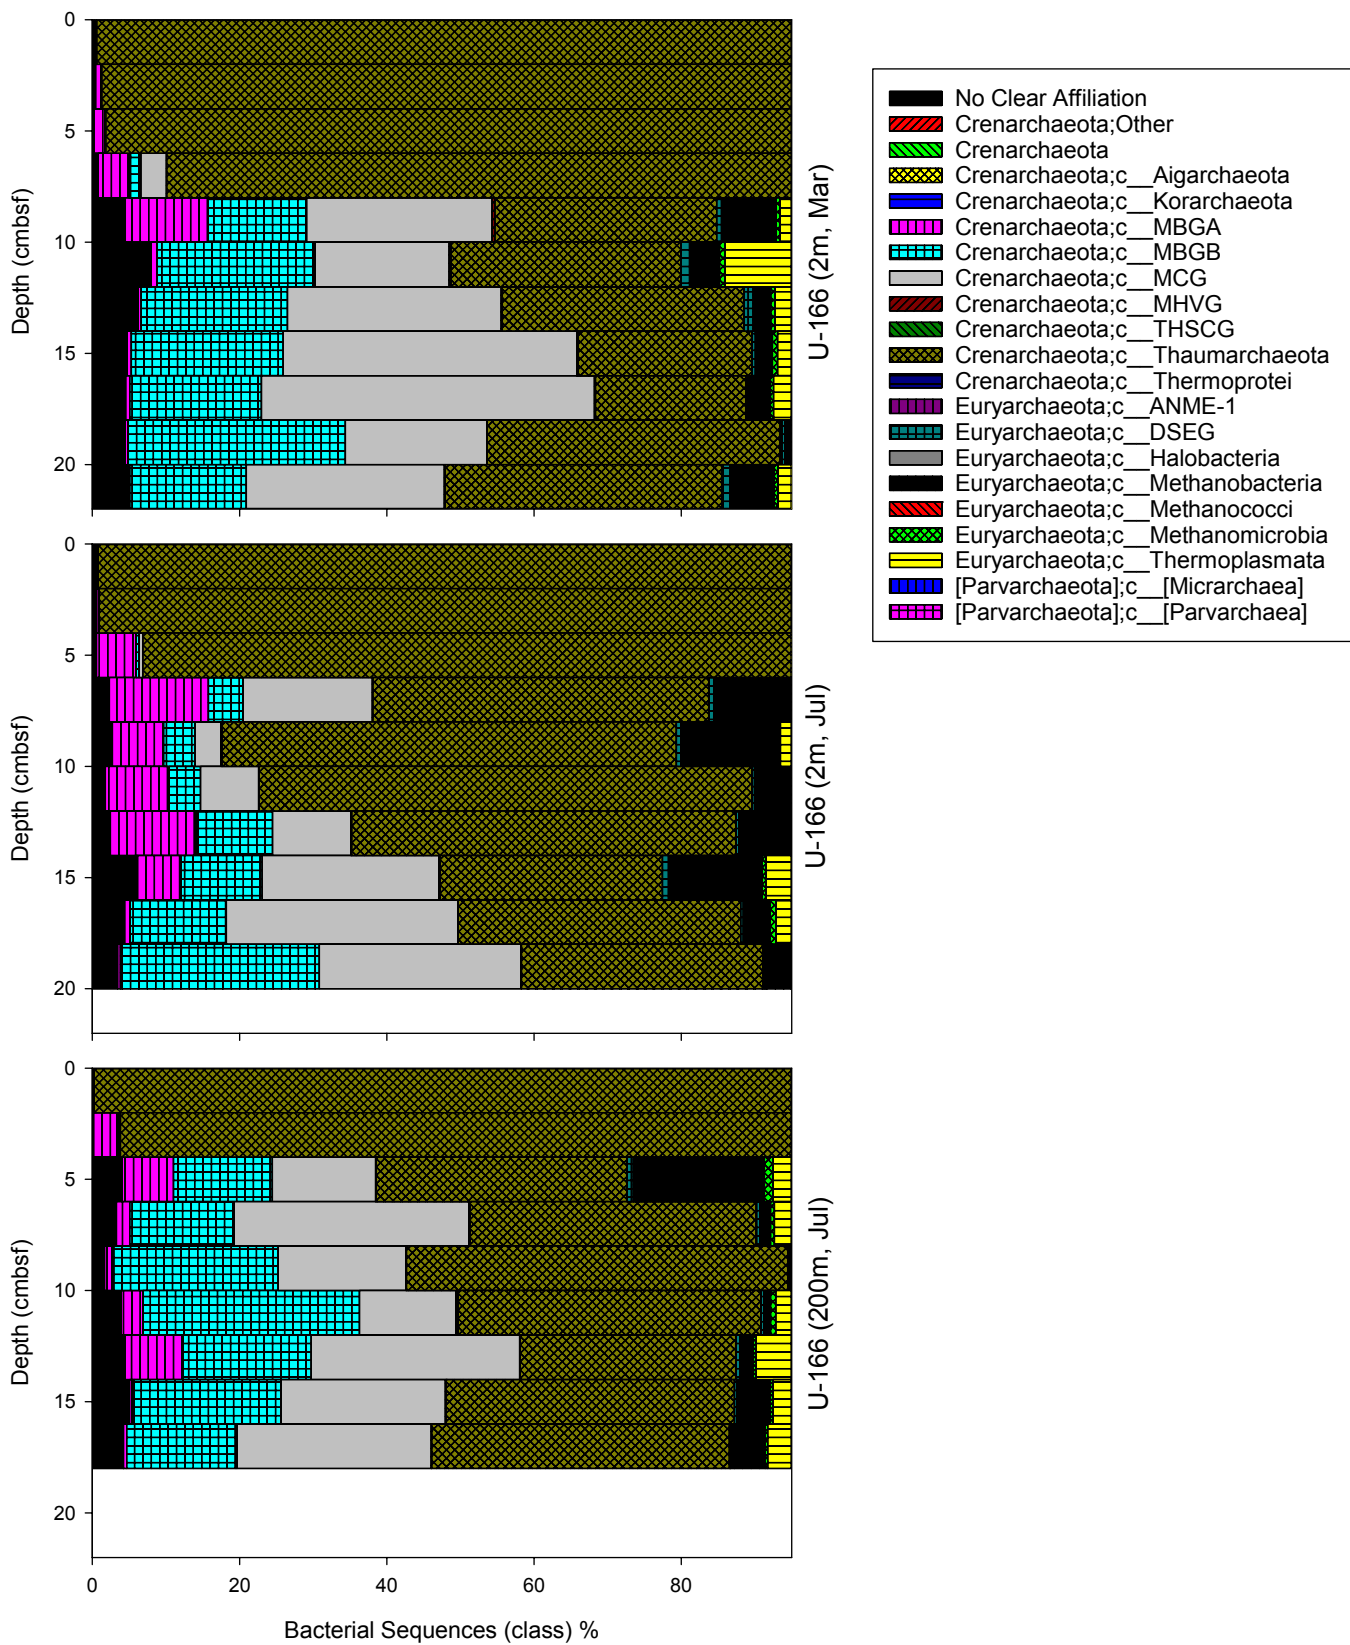

Figure S2.

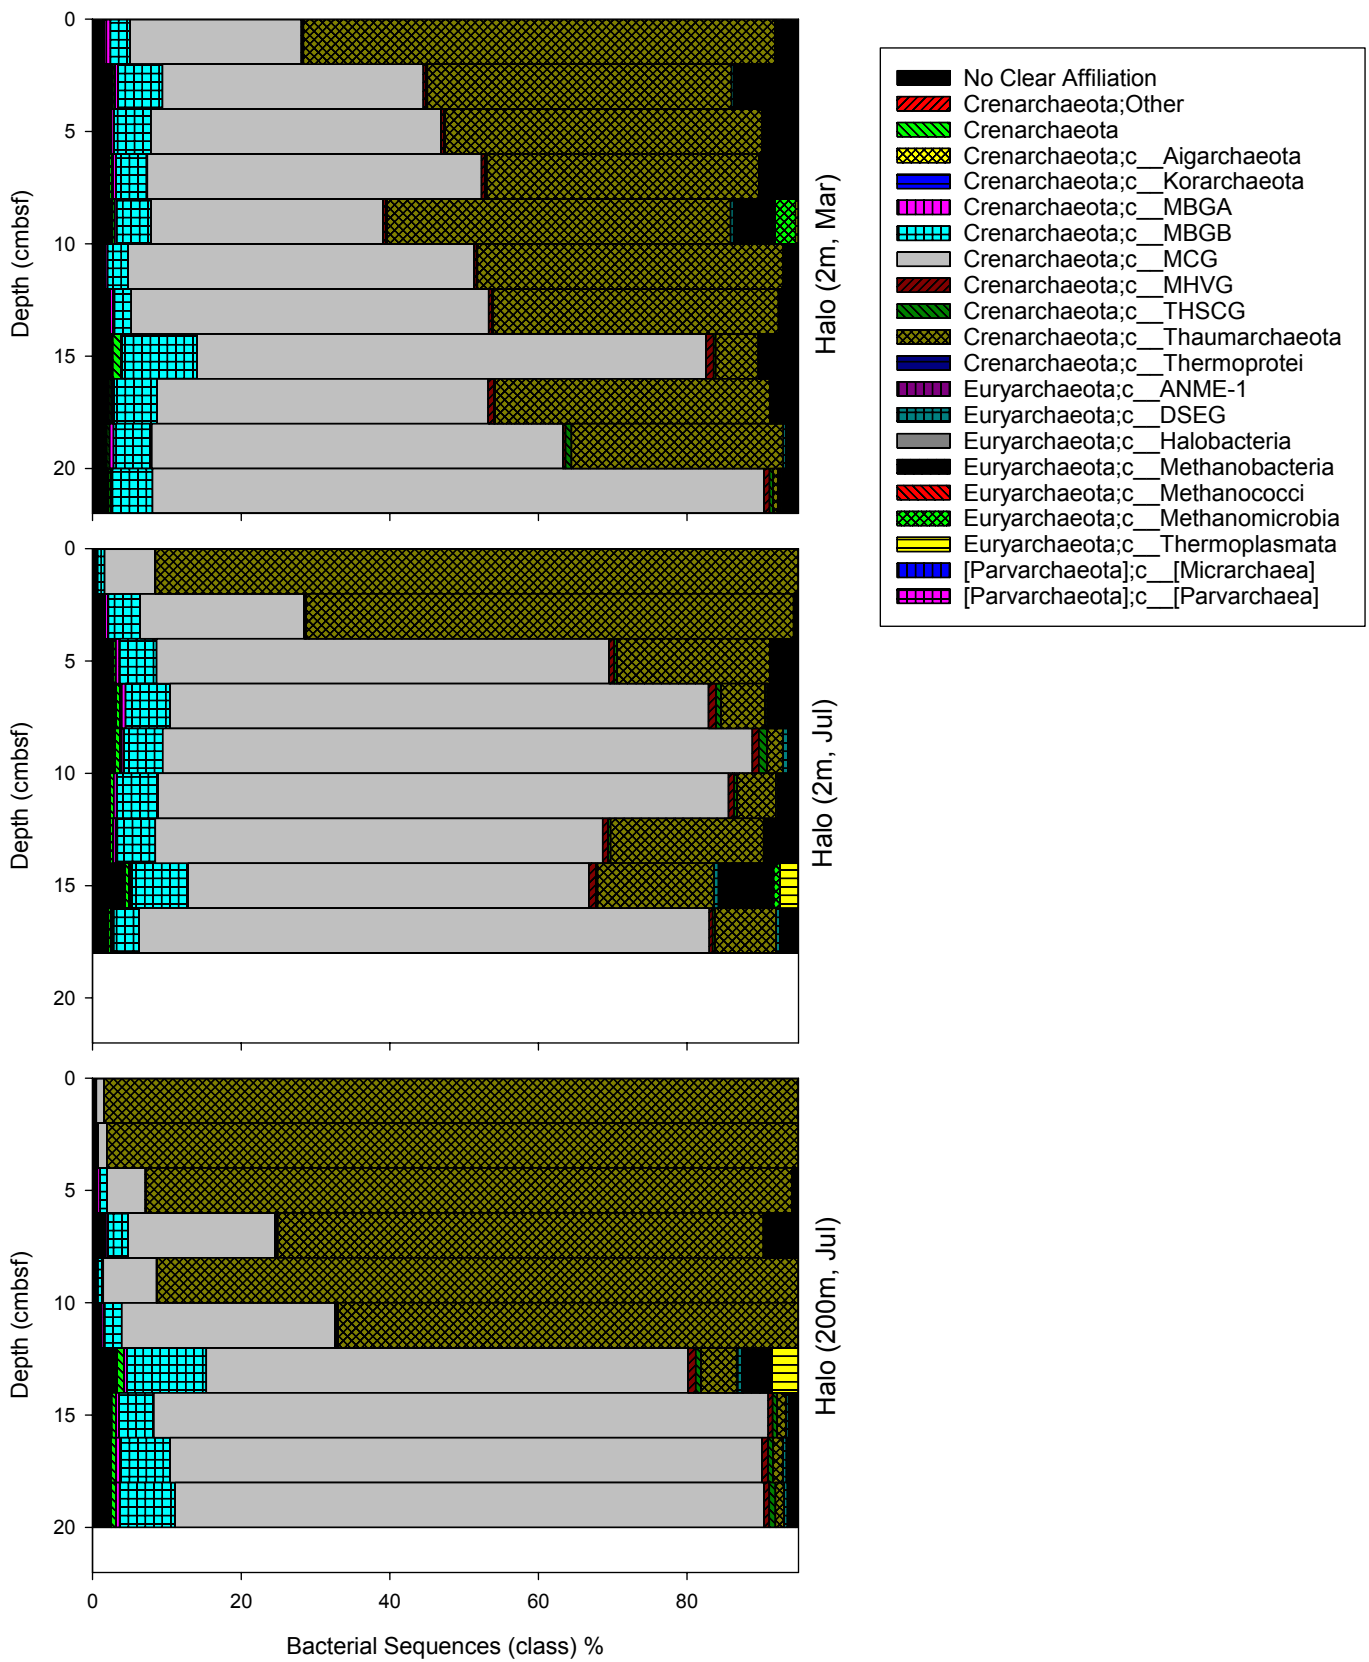

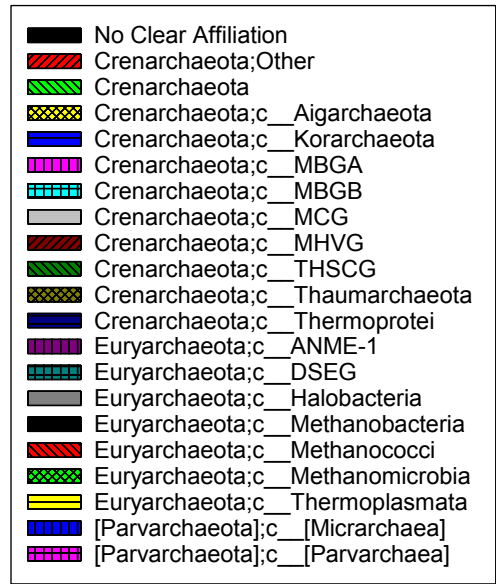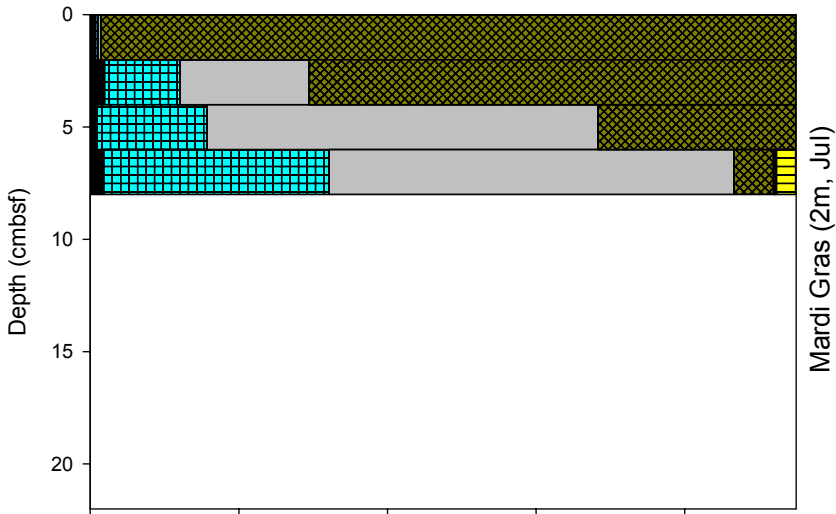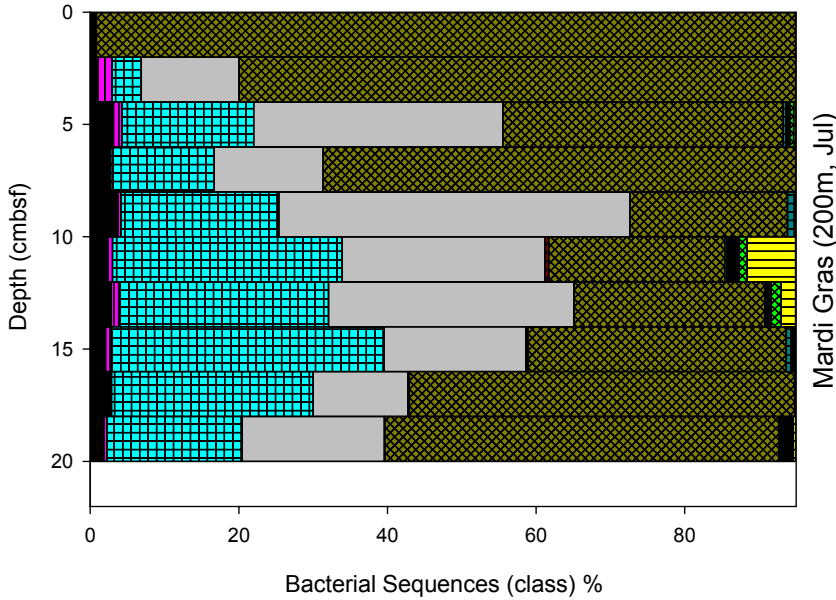

Bacterial Sequences (class) %

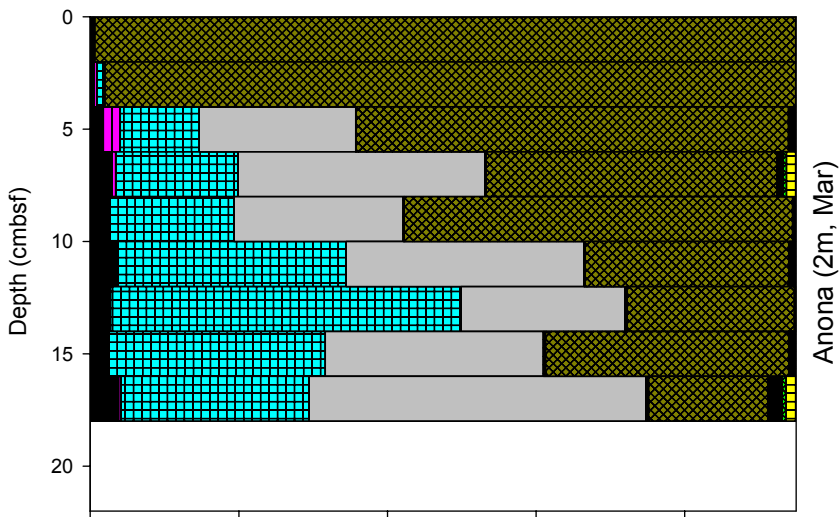

- No Clear Affiliation
- ▨ Crenarchaeota;Other
- ▨ Crenarchaeota
- ▨ Crenarchaeota;c\_\_Aigarchaeota
- ▨ Crenarchaeota;c\_\_Korarchaeota
- ▨ Crenarchaeota;c\_\_MBGA
- ▨ Crenarchaeota;c\_\_MBGB
- ▨ Crenarchaeota;c\_\_MCG
- ▨ Crenarchaeota;c\_\_MHVG
- ▨ Crenarchaeota;c\_\_THSCG
- ▨ Crenarchaeota;c\_\_Thaumarchaeota
- ▨ Crenarchaeota;c\_\_Thermoprotei
- ▨ Euryarchaeota;c\_\_ANME-1
- ▨ Euryarchaeota;c\_\_DSEG
- ▨ Euryarchaeota;c\_\_Halobacteria
- ▨ Euryarchaeota;c\_\_Methanobacteria
- ▨ Euryarchaeota;c\_\_Methanococci
- ▨ Euryarchaeota;c\_\_Methanomicrobia
- ▨ Euryarchaeota;c\_\_Thermoplasmata
- ▨ [Parvarchaeota];c\_\_[Micrarchaea]
- ▨ [Parvarchaeota];c\_\_[Parvarchaea]



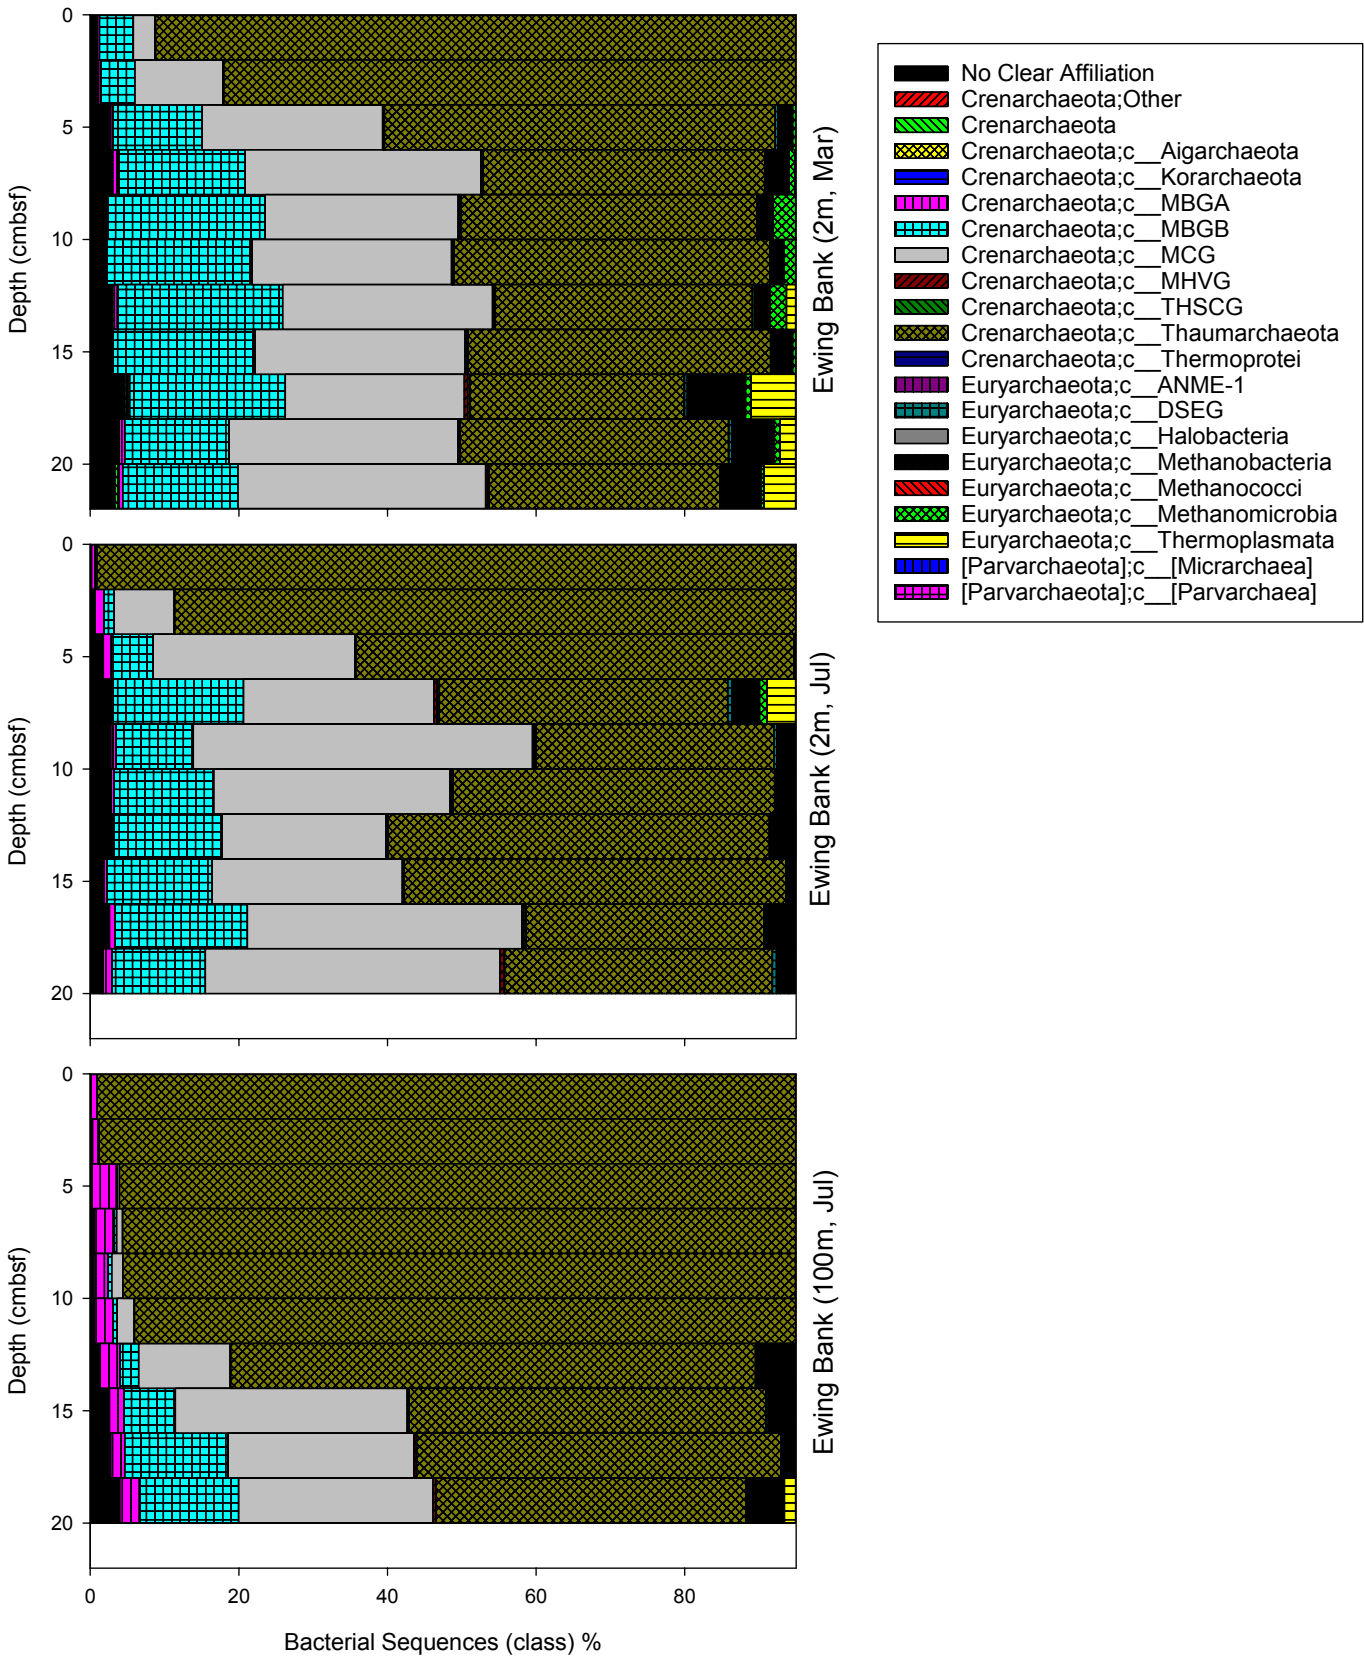



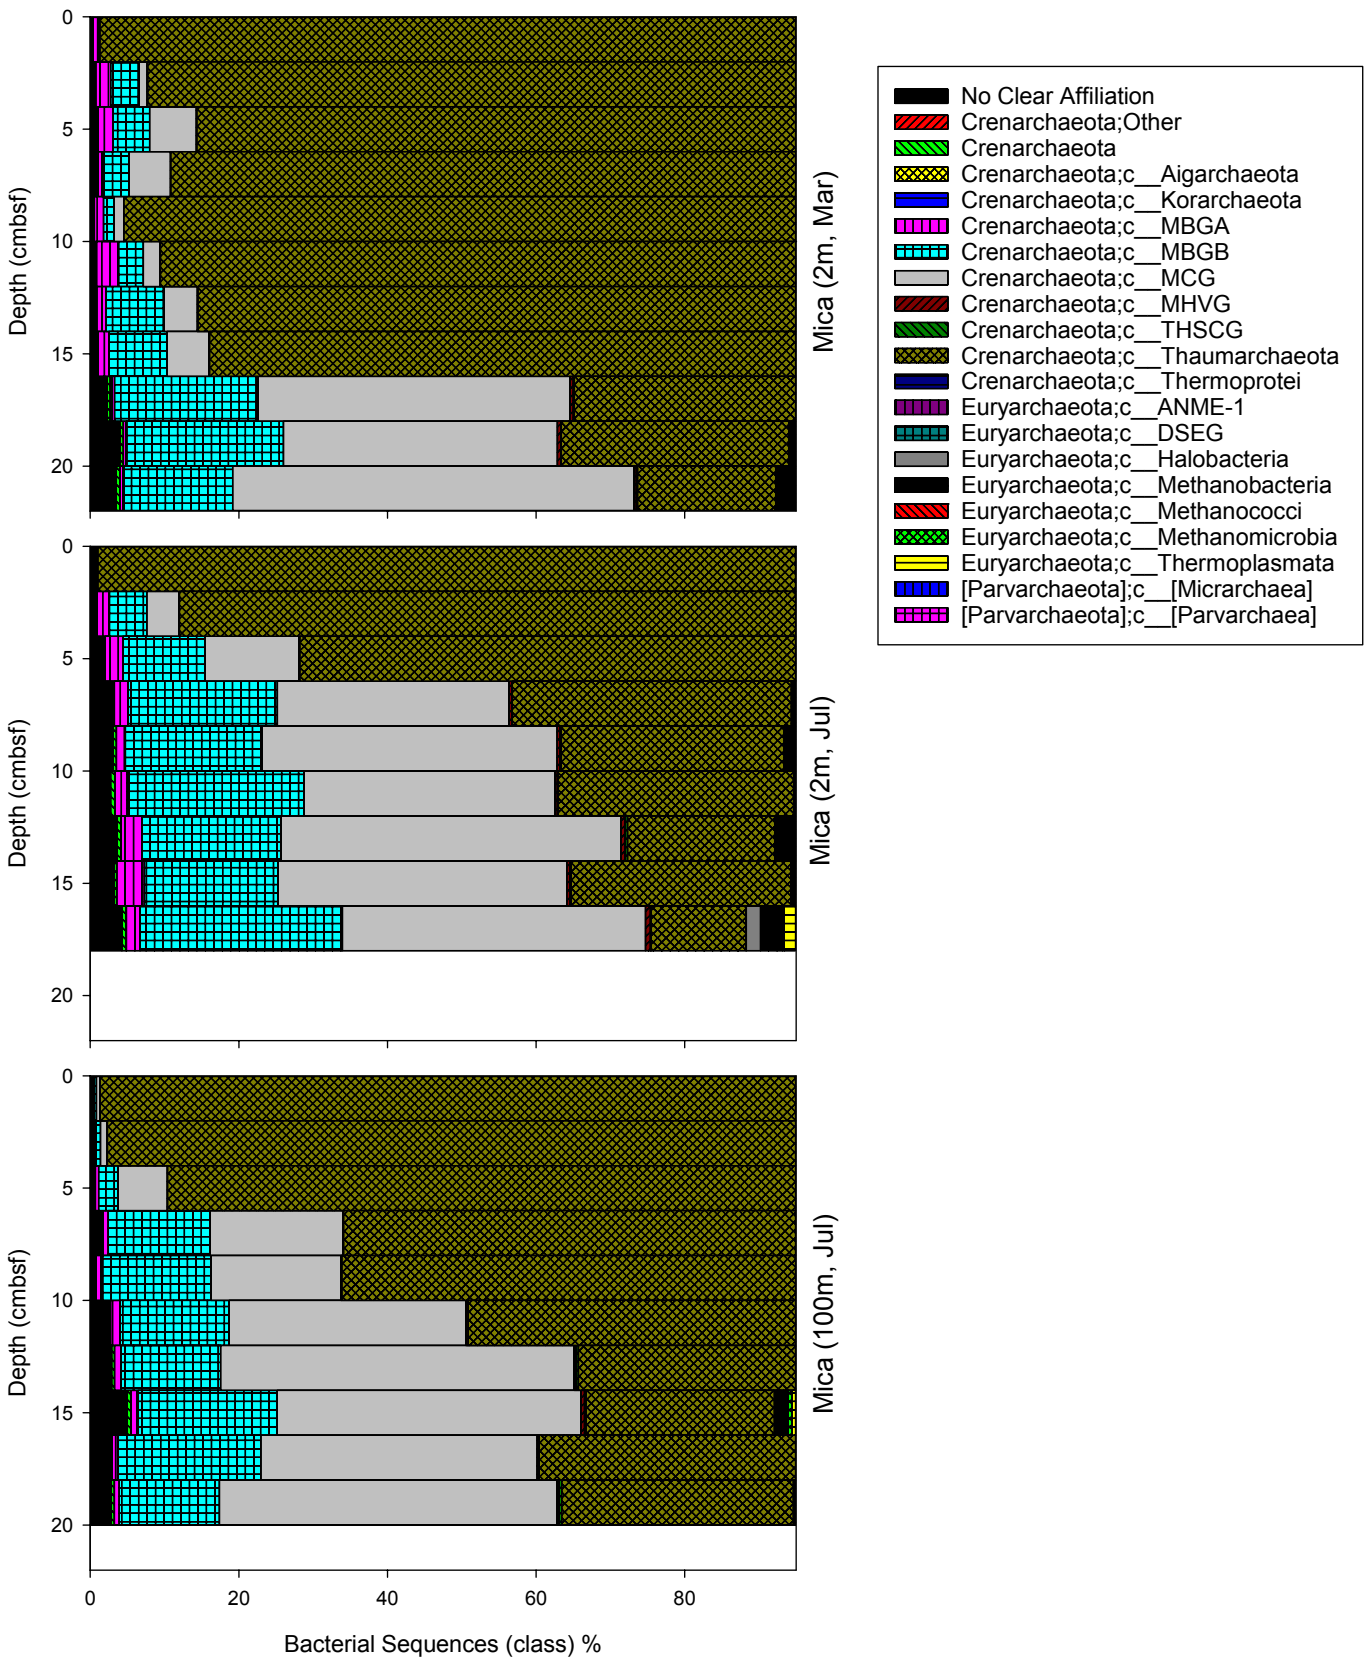

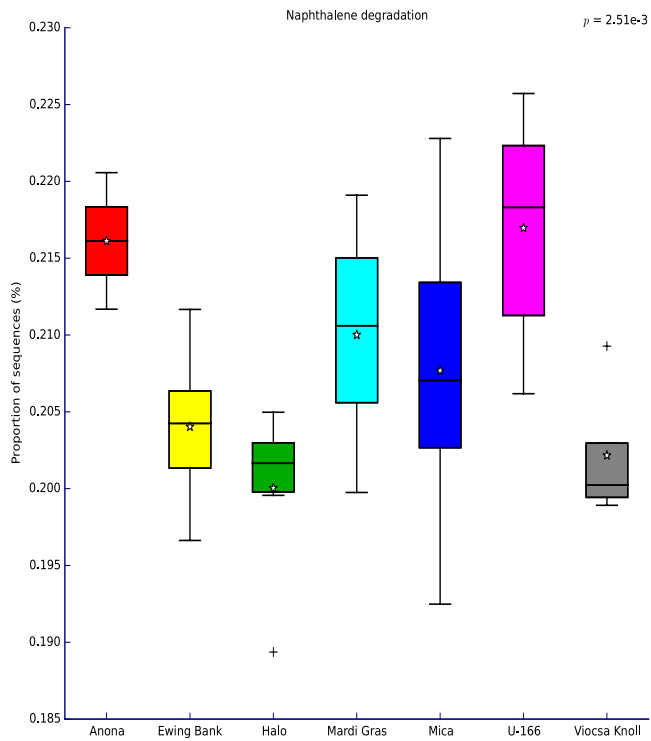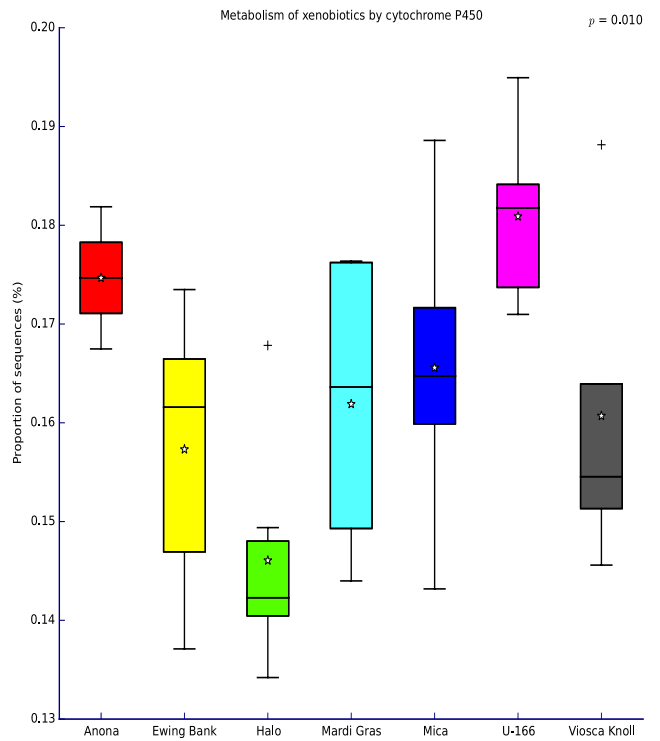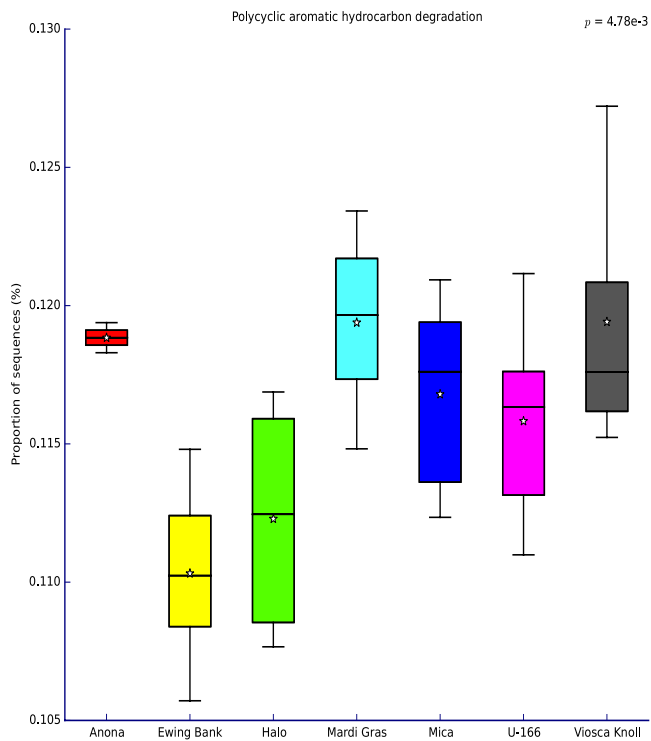

Figure S3.



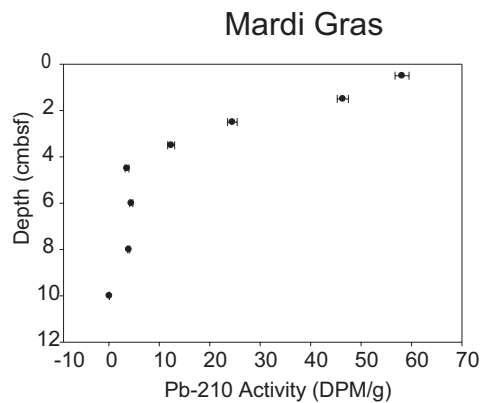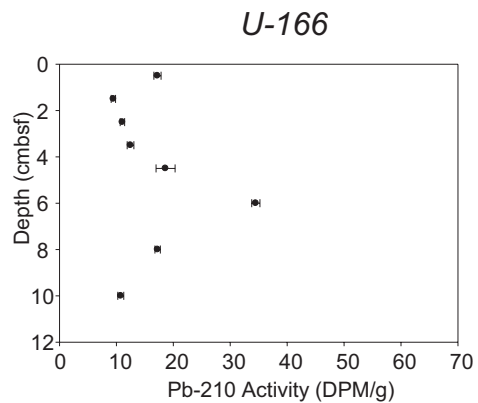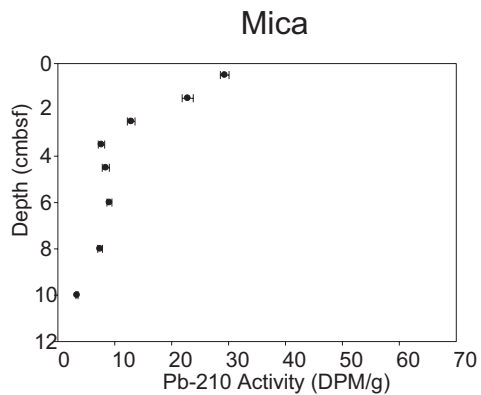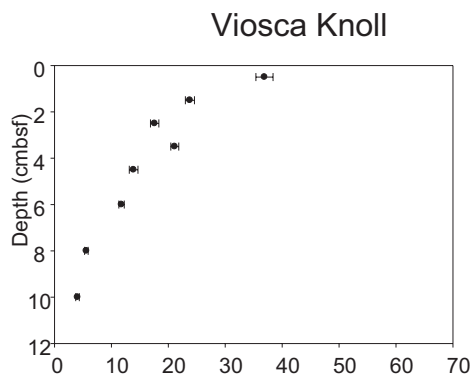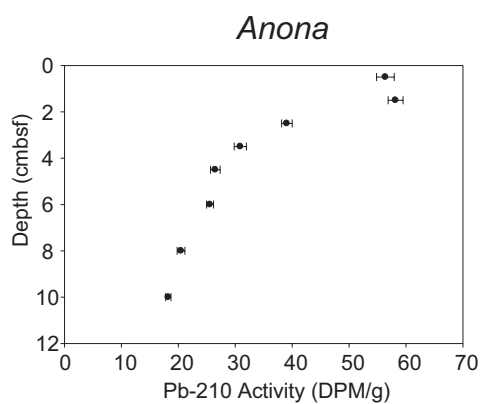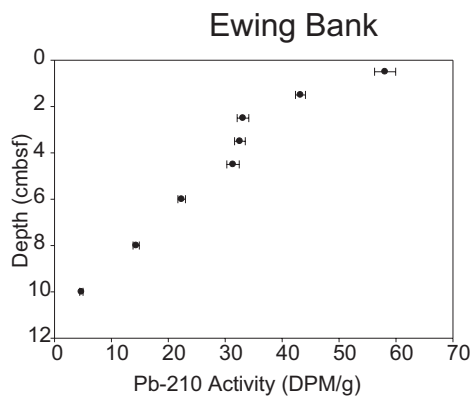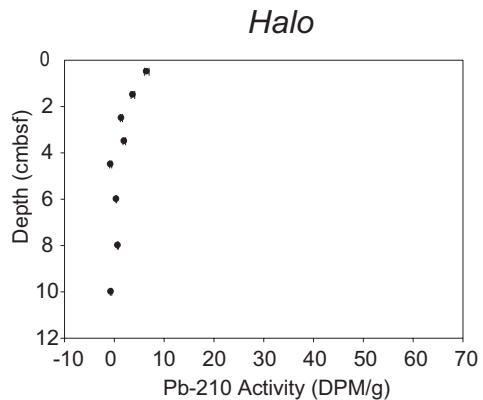

Figure S4.

Table S1. Coverage and richness indices for surface (0–10 cm below seafloor, cmbsf) and deep (11–22 cmbsf) sediment samples collected proximate to and away from shipwrecks.

| Shipwreck    | Depth (cmbsf) | Near Shipwreck (1-2 m) |                |                 |                | Away from Shipwreck (100-200 m) |                |                 |                |
|--------------|---------------|------------------------|----------------|-----------------|----------------|---------------------------------|----------------|-----------------|----------------|
|              |               | Good's Bacteria        | Good's Archaea | Chao 1 Bacteria | Chao 1 Archaea | Good's Bacteria                 | Good's Archaea | Chao 1 Bacteria | Chao 1 Archaea |
| <i>Halo</i>  | 0-10          | 0.87                   | 0.99           | 4447            | 1399           | 0.68                            | 0.83           | 3071            | 766            |
|              | 11-22         | 0.88                   | 0.99           | 3749            | 1308           | 0.85                            | 0.99           | 3096            | 1503           |
| Ewing Bank   | 0-10          | 0.86                   | 0.99           | 3512            | 731            | 0.67                            | 0.83           | 1565            | 174            |
|              | 11-22         | 0.90                   | 0.99           | 2991            | 803            | 0.85                            | 0.99           | 2415            | 924            |
| Mica         | 0-10          | 0.86                   | 1.00           | 3090            | 691            | 0.71                            | 0.82           | 2655            | 449            |
|              | 11-22         | 0.88                   | 1.00           | 3130            | 859            | 0.85                            | 0.99           | 2363            | 958            |
| <i>U-166</i> | 0-10          | 0.87                   | 1.00           | 2460            | 466            | 0.70                            | 0.83           | 1457            | 450            |
|              | 11-22         | 0.85                   | 0.99           | 2581            | 663            | 0.85                            | 0.99           | 2243            | 779            |
| Mardi Gras   | 0-10          | 0.66                   | 0.79           | 1180            | 192            | 0.72                            | 0.82           | 1899            | 248            |
|              | 11-20         | nd                     | nd             | nd              | nd             | 0.88                            | 0.97           | 2484            | 381            |
| <i>Anona</i> | 0-10          | 0.88                   | 1.00           | 3494            | 680            | nd                              | nd             | nd              | nd             |
|              | 11-18         | 0.90                   | 0.91           | 1378            | 1359           | nd                              | nd             | nd              | nd             |
| Viosca Knoll | 0-10          | 0.71                   | 0.83           | 2320            | 457            | 0.72                            | 0.83           | 2736            | 632            |
|              | 11-20         | 0.87                   | 0.99           | 3006            | 877            | 0.87                            | 0.99           | 3928            | 896            |

**Table S2. Similarity Percent (SIMPER) analysis, identifying bacterial drivers of within group similarity, and between group dissimilarity.**

Group *Halo*

Average similarity: 71.68

| Species                                                                           | Av.Abund | Av.Sim | Sim/SD | Contrib% | Cum.% |
|-----------------------------------------------------------------------------------|----------|--------|--------|----------|-------|
| p_Proteobacteria;c_Gammaproteobacteria;o_Thiotrichales;f_Piscirickettsiaceae;g_s_ | 0.25     | 1.51   | 3.33   | 2.11     | 2.11  |
| Unassigned;Other;Other;Other;Other;Other;Other                                    | 0.2      | 1.35   | 8.13   | 1.88     | 3.99  |
| p_Proteobacteria;c_Deltaproteobacteria;o_Myxococcales;f_g_s_                      | 0.16     | 1.07   | 15.49  | 1.49     | 5.48  |
| p_Proteobacteria;c_Deltaproteobacteria;o_NB1-j;f_NB1-i;g_s_                       | 0.16     | 1.03   | 5.9    | 1.44     | 6.92  |
| p_Proteobacteria;c_Deltaproteobacteria;o_NB1-j;f_g_s_                             | 0.15     | 1.03   | 12.96  | 1.44     | 8.36  |
| p_Proteobacteria;c_Alphaproteobacteria;o_f_g_s_                                   | 0.16     | 1.01   | 4.42   | 1.41     | 9.77  |
| p_Acidobacteria;c_Sva0725;o_Sva0725;f_g_s_                                        | 0.14     | 0.92   | 6.03   | 1.28     | 11.05 |

Group *Mica*

Average similarity: 69.65

| Species                                                                           | Av.Abund | Av.Sim | Sim/SD | Contrib% | Cum.% |
|-----------------------------------------------------------------------------------|----------|--------|--------|----------|-------|
| p_Proteobacteria;c_Gammaproteobacteria;o_Thiotrichales;f_Piscirickettsiaceae;g_s_ | 0.29     | 1.9    | 4.25   | 2.73     | 2.73  |
| p_Proteobacteria;c_Deltaproteobacteria;o_NB1-j;f_NB1-i;g_s_                       | 0.22     | 1.55   | 9.94   | 2.22     | 4.95  |
| p_Bacteroidetes;c_Cytophagia;o_Cytophagales;f_Flammeovirgaceae;g_s_               | 0.21     | 1.4    | 3.84   | 2.01     | 6.96  |
| Unassigned;Other;Other;Other;Other;Other;Other                                    | 0.18     | 1.3    | 13.2   | 1.86     | 8.82  |
| p_Proteobacteria;c_Deltaproteobacteria;o_Myxococcales;f_g_s_                      | 0.14     | 1.03   | 16.54  | 1.48     | 10.3  |

Group *U-166*

Average similarity: 64.24

| Species                                                                           | Av.Abund | Av.Sim | Sim/SD | Contrib% | Cum.% |
|-----------------------------------------------------------------------------------|----------|--------|--------|----------|-------|
| p_Proteobacteria;c_Gammaproteobacteria;o_Thiotrichales;f_Piscirickettsiaceae;g_s_ | 0.29     | 1.91   | 2.46   | 2.97     | 2.97  |
| p_Proteobacteria;c_Deltaproteobacteria;o_NB1-j;f_NB1-i;g_s_                       | 0.24     | 1.88   | 9.62   | 2.92     | 5.89  |
| Unassigned;Other;Other;Other;Other;Other;Other                                    | 0.2      | 1.52   | 5.98   | 2.36     | 8.26  |
| p_Bacteroidetes;c_Cytophagia;o_Cytophagales;f_Flammeovirgaceae;g_s_               | 0.2      | 1.51   | 6.86   | 2.36     | 10.61 |

Group *Anona*

Average similarity: 68.20

| Species                                                                           | Av.Abund | Av.Sim | Sim/SD | Contrib% | Cum.% |
|-----------------------------------------------------------------------------------|----------|--------|--------|----------|-------|
| p_Proteobacteria;c_Gammaproteobacteria;o_Thiotrichales;f_Piscirickettsiaceae;g_s_ | 0.27     | 1.59   | 3.45   | 2.33     | 2.33  |
| p_Proteobacteria;c_Deltaproteobacteria;o_NB1-j;f_NB1-i;g_s_                       | 0.2      | 1.42   | 16.06  | 2.08     | 4.41  |
| Unassigned;Other;Other;Other;Other;Other;Other                                    | 0.19     | 1.3    | 7.82   | 1.91     | 6.32  |
| p_Bacteroidetes;c_Cytophagia;o_Cytophagales;f_Flammeovirgaceae;g_s_               | 0.19     | 1.21   | 5.74   | 1.77     | 8.09  |
| p_Proteobacteria;c_Deltaproteobacteria;o_NB1-j;f_g_s_                             | 0.16     | 1.1    | 13.77  | 1.61     | 9.7   |
| p_Proteobacteria;c_Alphaproteobacteria;o_f_g_s_                                   | 0.17     | 1.04   | 3.81   | 1.53     | 11.23 |

Group *Ewing Bank*

Average similarity: 64.08

| Species                                                                           | Av.Abund | Av.Sim | Sim/SD | Contrib% | Cum.% |
|-----------------------------------------------------------------------------------|----------|--------|--------|----------|-------|
| p_Proteobacteria;c_Gammaproteobacteria;o_Thiotrichales;f_Piscirickettsiaceae;g_s_ | 0.27     | 1.59   | 1.6    | 2.47     | 2.47  |
| Unassigned;Other;Other;Other;Other;Other;Other                                    | 0.2      | 1.49   | 11.4   | 2.32     | 4.79  |
| p_Proteobacteria;c_Deltaproteobacteria;o_NB1-j;f_NB1-i;g_s_                       | 0.21     | 1.47   | 4.79   | 2.29     | 7.09  |
| p_Proteobacteria;c_Alphaproteobacteria;o_f_g_s_                                   | 0.18     | 1.21   | 3.2    | 1.89     | 8.98  |
| p_Proteobacteria;c_Deltaproteobacteria;o_NB1-j;f_g_s_                             | 0.16     | 1.21   | 7.67   | 1.88     | 10.86 |

Group *Viosca Knoll*

Average similarity: 74.17

| Species                                                                           | Av.Abund | Av.Sim | Sim/SD | Contrib% | Cum.% |
|-----------------------------------------------------------------------------------|----------|--------|--------|----------|-------|
| p_Proteobacteria;c_Gammaproteobacteria;o_Thiotrichales;f_Piscirickettsiaceae;g_s_ | 0.33     | 2.24   | 6.18   | 3.02     | 3.02  |
| p_Proteobacteria;c_Deltaproteobacteria;o_NB1-j;f_NB1-i;g_s_                       | 0.2      | 1.47   | 13.08  | 1.98     | 5     |
| p_Proteobacteria;c_Deltaproteobacteria;o_NB1-j;f_g_s_                             | 0.17     | 1.23   | 19.71  | 1.65     | 6.66  |
| p_Proteobacteria;c_Deltaproteobacteria;o_Myxococcales;f_g_s_                      | 0.17     | 1.22   | 13.46  | 1.65     | 8.3   |
| Unassigned;Other;Other;Other;Other;Other;Other                                    | 0.17     | 1.21   | 9.3    | 1.63     | 9.93  |
| p_Proteobacteria;c_Alphaproteobacteria;o_f_g_s_                                   | 0.17     | 1.21   | 8.55   | 1.63     | 11.56 |

Group *Mardi Gras*

Average similarity: 61.44

| Species                                                                           | Av.Abund | Av.Sim | Sim/SD | Contrib% | Cum.% |
|-----------------------------------------------------------------------------------|----------|--------|--------|----------|-------|
| p_Proteobacteria;c_Deltaproteobacteria;o_NB1-j;f_NB1-i;g_s_                       | 0.22     | 1.59   | 5.86   | 2.59     | 2.59  |
| Unassigned;Other;Other;Other;Other;Other;Other                                    | 0.18     | 1.42   | 10.69  | 2.31     | 4.9   |
| p_Proteobacteria;c_Gammaproteobacteria;o_Thiotrichales;f_Piscirickettsiaceae;g_s_ | 0.23     | 1.21   | 1.68   | 1.96     | 6.86  |
| p_Planctomycetes;c_Phycisphaerae;o_MSBL9;f_g_s_                                   | 0.2      | 1.2    | 1.62   | 1.95     | 8.81  |
| p_Bacteroidetes;c_Cytophagia;o_Cytophagales;f_Flammeovirgaceae;g_s_               | 0.17     | 1.13   | 2.72   | 1.84     | 10.65 |

Groups *Halo* & *Mica*

Average dissimilarity = 33.67

| Species                                                                                            | Group <i>Halo</i><br>Av.Abund | Group <i>Mica</i><br>Av.Abund | Av.Diss | Diss/SD | Contrib% | Cum.% |
|----------------------------------------------------------------------------------------------------|-------------------------------|-------------------------------|---------|---------|----------|-------|
| p_Chloroflexi;c_Dehalococcoidetes;o_Dehalococcoidales;f_Dehalococcoidaceae;g_s_                    | 0.14                          | 0.09                          | 0.37    | 1       | 1.09     | 1.09  |
| p_Proteobacteria;c_Gammaproteobacteria;o_Thiotrichales;f_Piscirickettsiaceae;g_s_                  | 0.25                          | 0.29                          | 0.31    | 1.27    | 0.91     | 2     |
| p_Bacteroidetes;c_Cytophagia;o_Cytophagales;f_Flammeovirgaceae;g_s_                                | 0.15                          | 0.21                          | 0.28    | 1.67    | 0.83     | 2.83  |
| p_Planctomycetes;c_Phycisphaerae;o_MSBL9;f_g_s_                                                    | 0.11                          | 0.16                          | 0.25    | 1.62    | 0.73     | 3.56  |
| p_Bacteroidetes;c_Bacteroidia;o_Bacteroidales;f_g_s_                                               | 0.11                          | 0.12                          | 0.23    | 1.63    | 0.68     | 4.24  |
| p_Proteobacteria;c_Deltaproteobacteria;o_NB1-j;f_NB1-i;g_s_                                        | 0.16                          | 0.22                          | 0.22    | 1.62    | 0.64     | 4.88  |
| p_Proteobacteria;c_Deltaproteobacteria;o_Desulfobacterales;f_Desulfobulbaceae;g_s_                 | 0.12                          | 0.1                           | 0.2     | 1.37    | 0.61     | 5.48  |
| p_Proteobacteria;c_Deltaproteobacteria;o_Desulfobacterales;f_Desulfobacteraceae;g_Desulfococcus;s_ | 0.14                          | 0.13                          | 0.2     | 1.52    | 0.59     | 6.07  |
| p_Proteobacteria;c_Deltaproteobacteria;o_f_g_s_                                                    | 0.15                          | 0.12                          | 0.2     | 1.33    | 0.59     | 6.66  |
| p_OP8;c_OP8_1;o_f_g_s_                                                                             | 0.07                          | 0.03                          | 0.2     | 1.05    | 0.58     | 7.24  |

|                                                                                         |      |      |      |      |      |      |
|-----------------------------------------------------------------------------------------|------|------|------|------|------|------|
| p_Fusobacteria;c_Fusobacteriia;o_Fusobacteriales;f_Fusobacteriaceae;g_Propionigenium;s_ | 0.07 | 0.02 | 0.2  | 2.25 | 0.58 | 7.82 |
| p_Proteobacteria;c_Deltaproteobacteria;o_Desulfobacterales;f_Desulfobacteraceae;g_s_    | 0.1  | 0.07 | 0.19 | 1.39 | 0.57 | 8.4  |
| p_Lentisphaerae;c_[Lentisphaeria];o_Lentisphaerales;f_g_s_                              | 0.08 | 0.03 | 0.19 | 1.75 | 0.55 | 8.95 |
| p_Proteobacteria;c_Gammaproteobacteria;o_Oceanospirillales;f_Endozoicimonaceae;g_s_     | 0.06 | 0    | 0.19 | 1.34 | 0.55 | 9.5  |

Groups Halo & U-166

Average dissimilarity = 38.90

| Species                                                                                            | Group Halo | Group U-166 |         |         |          |       |
|----------------------------------------------------------------------------------------------------|------------|-------------|---------|---------|----------|-------|
|                                                                                                    | Av.Abund   | Av.Abund    | Av.Diss | Diss/SD | Contrib% | Cum.% |
| p_Chloroflexi;c_Dehalococcoidetes;o_Dehalococcoidales;f_Dehalococcoidaceae;g_s_                    | 0.14       | 0.08        | 0.41    | 1.04    | 1.05     | 1.05  |
| p_Proteobacteria;c_Gammaproteobacteria;o_Thiotrichales;f_Piscirickettsiaceae;g_s_                  | 0.25       | 0.29        | 0.41    | 1.53    | 1.05     | 2.1   |
| p_Planctomycetes;c_Phycisphaerae;o_MSBL9;f_g_s_                                                    | 0.11       | 0.16        | 0.4     | 1.49    | 1.03     | 3.12  |
| p_NC10;c_wb1-A12;o_f_g_s_                                                                          | 0.02       | 0.11        | 0.35    | 2.37    | 0.91     | 4.03  |
| p_Bacteroidetes;c_Bacteroidia;o_Bacteroidales;f_g_s_                                               | 0.11       | 0.11        | 0.32    | 1.94    | 0.83     | 4.86  |
| p_Proteobacteria;c_Alphaproteobacteria;o_Rhodobacterales;f_Rhodobacteraceae;g_s_                   | 0.12       | 0.2         | 0.31    | 1.37    | 0.8      | 5.66  |
| p_Proteobacteria;c_Deltaproteobacteria;o_NB1-j;f_NB1-i;g_s_                                        | 0.16       | 0.24        | 0.29    | 2.24    | 0.76     | 6.42  |
| p_Proteobacteria;c_Deltaproteobacteria;o_Desulfobacterales;f_Desulfobacteraceae;g_Desulfococcus;s_ | 0.14       | 0.11        | 0.28    | 1.59    | 0.73     | 7.15  |
| p_Proteobacteria;c_Deltaproteobacteria;o_f_g_s_                                                    | 0.15       | 0.09        | 0.27    | 1.49    | 0.7      | 7.85  |
| p_Proteobacteria;c_Deltaproteobacteria;o_Desulfobacterales;f_Desulfobulbaceae;g_s_                 | 0.12       | 0.06        | 0.26    | 1.64    | 0.67     | 8.52  |
| p_Lentisphaerae;c_[Lentisphaeria];o_Lentisphaerales;f_g_s_                                         | 0.08       | 0.01        | 0.25    | 2.25    | 0.65     | 9.17  |

Groups Mica & U-166

Average dissimilarity = 34.96

| Species                                                                                            | Group Mica | Group U-166 |         |         |          |       |
|----------------------------------------------------------------------------------------------------|------------|-------------|---------|---------|----------|-------|
|                                                                                                    | Av.Abund   | Av.Abund    | Av.Diss | Diss/SD | Contrib% | Cum.% |
| p_Planctomycetes;c_Phycisphaerae;o_MSBL9;f_g_s_                                                    | 0.16       | 0.16        | 0.42    | 1.77    | 1.2      | 1.2   |
| p_Proteobacteria;c_Gammaproteobacteria;o_Thiotrichales;f_Piscirickettsiaceae;g_s_                  | 0.29       | 0.29        | 0.38    | 1.45    | 1.1      | 2.3   |
| p_Bacteroidetes;c_Bacteroidia;o_Bacteroidales;f_g_s_                                               | 0.12       | 0.11        | 0.37    | 1.51    | 1.05     | 3.35  |
| p_Proteobacteria;c_Deltaproteobacteria;o_Desulfobacterales;f_Desulfobacteraceae;g_Desulfococcus;s_ | 0.13       | 0.11        | 0.32    | 1.51    | 0.9      | 4.25  |
| p_NC10;c_wb1-A12;o_f_g_s_                                                                          | 0.04       | 0.11        | 0.3     | 1.93    | 0.87     | 5.12  |
| p_Chloroflexi;c_Dehalococcoidetes;o_Dehalococcoidales;f_Dehalococcoidaceae;g_s_                    | 0.09       | 0.08        | 0.3     | 1.4     | 0.84     | 5.96  |
| p_Proteobacteria;c_Alphaproteobacteria;o_f_g_s_                                                    | 0.14       | 0.19        | 0.28    | 1.39    | 0.81     | 6.78  |
| p_Proteobacteria;c_Alphaproteobacteria;o_Rhodobacterales;f_Rhodobacteraceae;g_s_                   | 0.16       | 0.2         | 0.25    | 1.34    | 0.72     | 7.5   |
| p_Actinobacteria;c_OPB41;o_f_g_s_                                                                  | 0.06       | 0.1         | 0.24    | 1.13    | 0.69     | 8.19  |
| p_Proteobacteria;c_Deltaproteobacteria;o_Desulfobacterales;f_Desulfobulbaceae;g_s_                 | 0.1        | 0.06        | 0.23    | 1.43    | 0.66     | 8.86  |
| p_Nitrospirae;c_Nitrospira;o_Nitrospirales;f_[Thermodesulfovibrionaceae];g_s_                      | 0.07       | 0.04        | 0.21    | 1.52    | 0.59     | 9.45  |
| p_Proteobacteria;c_Gammaproteobacteria;o_Chromatiales;f_Ectothiorhodospiraceae;g_s_                | 0.09       | 0.11        | 0.2     | 1.5     | 0.57     | 10.02 |

Groups Halo & Anona

Average dissimilarity = 34.63

| Species                                                                                            | Group Halo | Group Anona |         |         |          |       |
|----------------------------------------------------------------------------------------------------|------------|-------------|---------|---------|----------|-------|
|                                                                                                    | Av.Abund   | Av.Abund    | Av.Diss | Diss/SD | Contrib% | Cum.% |
| p_Chloroflexi;c_Dehalococcoidetes;o_Dehalococcoidales;f_Dehalococcoidaceae;g_s_                    | 0.14       | 0.08        | 0.38    | 1       | 1.09     | 1.09  |
| p_Proteobacteria;c_Gammaproteobacteria;o_Thiotrichales;f_Piscirickettsiaceae;g_s_                  | 0.25       | 0.27        | 0.33    | 1.43    | 0.95     | 2.04  |
| p_Bacteroidetes;c_Bacteroidia;o_Bacteroidales;f_g_s_                                               | 0.11       | 0.14        | 0.29    | 2.2     | 0.82     | 2.86  |
| p_Planctomycetes;c_Phycisphaerae;o_MSBL9;f_g_s_                                                    | 0.11       | 0.16        | 0.28    | 1.75    | 0.81     | 3.68  |
| p_Proteobacteria;c_Deltaproteobacteria;o_Desulfobacterales;f_Desulfobacteraceae;g_Desulfococcus;s_ | 0.14       | 0.15        | 0.28    | 2.2     | 0.8      | 4.48  |
| p_Proteobacteria;c_Deltaproteobacteria;o_Desulfobacterales;f_Desulfobulbaceae;g_s_                 | 0.12       | 0.13        | 0.25    | 1.49    | 0.72     | 5.2   |
| p_TM6;c_SJA-4;o_f_g_s_                                                                             | 0.04       | 0.1         | 0.22    | 1.76    | 0.64     | 5.84  |
| p_Fusobacteria;c_Fusobacteriia;o_Fusobacteriales;f_Fusobacteriaceae;g_Propionigenium;s_            | 0.07       | 0.01        | 0.22    | 2.81    | 0.64     | 6.47  |
| p_Proteobacteria;c_Deltaproteobacteria;o_f_g_s_                                                    | 0.15       | 0.11        | 0.22    | 1.37    | 0.63     | 7.1   |
| p_Lentisphaerae;c_[Lentisphaeria];o_Lentisphaerales;f_g_s_                                         | 0.08       | 0.02        | 0.21    | 2.1     | 0.62     | 7.71  |
| p_Bacteroidetes;c_Cytophagia;o_Cytophagales;f_Flammeovirgaceae;g_s_                                | 0.15       | 0.19        | 0.21    | 1.39    | 0.61     | 8.32  |
| p_Proteobacteria;c_Deltaproteobacteria;o_Desulfobacterales;f_Desulfobacteraceae;g_s_               | 0.1        | 0.09        | 0.19    | 1.31    | 0.55     | 8.87  |
| p_Proteobacteria;c_Alphaproteobacteria;o_f_g_s_                                                    | 0.16       | 0.17        | 0.19    | 1.49    | 0.54     | 9.41  |

Groups Halo & Ewing Bank

Average dissimilarity = 37.09

| Species                                                                                            | Group Halo | Group Ewing Bank |         |         |          |       |
|----------------------------------------------------------------------------------------------------|------------|------------------|---------|---------|----------|-------|
|                                                                                                    | Av.Abund   | Av.Abund         | Av.Diss | Diss/SD | Contrib% | Cum.% |
| p_Chloroflexi;c_Dehalococcoidetes;o_Dehalococcoidales;f_Dehalococcoidaceae;g_s_                    | 0.14       | 0.15             | 0.47    | 1.24    | 1.27     | 1.27  |
| p_Proteobacteria;c_Gammaproteobacteria;o_Thiotrichales;f_Piscirickettsiaceae;g_s_                  | 0.25       | 0.27             | 0.46    | 1.41    | 1.24     | 2.51  |
| p_Planctomycetes;c_Phycisphaerae;o_MSBL9;f_g_s_                                                    | 0.11       | 0.16             | 0.32    | 1.71    | 0.87     | 3.38  |
| p_NC10;c_wb1-A12;o_f_g_s_                                                                          | 0.02       | 0.1              | 0.31    | 1.72    | 0.83     | 4.21  |
| p_Proteobacteria;c_Deltaproteobacteria;o_Desulfobacterales;f_Desulfobulbaceae;g_s_                 | 0.12       | 0.06             | 0.29    | 1.57    | 0.79     | 5     |
| p_Proteobacteria;c_Deltaproteobacteria;o_Desulfobacterales;f_Desulfobacteraceae;g_Desulfococcus;s_ | 0.14       | 0.14             | 0.27    | 1.63    | 0.73     | 5.73  |
| p_Proteobacteria;c_Deltaproteobacteria;o_Desulfobacterales;f_Desulfobacteraceae;g_s_               | 0.1        | 0.07             | 0.26    | 1.44    | 0.69     | 6.42  |
| p_Proteobacteria;c_Deltaproteobacteria;o_f_g_s_                                                    | 0.15       | 0.1              | 0.25    | 1.35    | 0.68     | 7.1   |
| p_Bacteroidetes;c_Cytophagia;o_Cytophagales;f_Flammeovirgaceae;g_s_                                | 0.15       | 0.17             | 0.24    | 1.43    | 0.65     | 7.75  |
| p_Proteobacteria;c_Deltaproteobacteria;o_Desulfuromonadales;f_Desulfuromonadaceae;g_s_             | 0.11       | 0.07             | 0.24    | 1.32    | 0.64     | 8.39  |
| p_OP8;c_OP8_1;o_f_g_s_                                                                             | 0.07       | 0.06             | 0.23    | 1.3     | 0.63     | 9.02  |
| p_Fusobacteria;c_Fusobacteriia;o_Fusobacteriales;f_Fusobacteriaceae;g_Propionigenium;s_            | 0.07       | 0.01             | 0.23    | 2.65    | 0.61     | 9.63  |
| p_Lentisphaerae;c_[Lentisphaeria];o_Lentisphaerales;f_g_s_                                         | 0.08       | 0.02             | 0.23    | 1.86    | 0.61     | 10.24 |

Groups Mica & Ewing Bank

Average dissimilarity = 35.71

| Species                                                                                            | Group Mica | Group Ewing Bank |         |         |          |       |
|----------------------------------------------------------------------------------------------------|------------|------------------|---------|---------|----------|-------|
|                                                                                                    | Av.Abund   | Av.Abund         | Av.Diss | Diss/SD | Contrib% | Cum.% |
| p_Proteobacteria;c_Gammaproteobacteria;o_Thiotrichales;f_Piscirickettsiaceae;g_s_                  | 0.29       | 0.27             | 0.46    | 1.4     | 1.28     | 1.28  |
| p_Chloroflexi;c_Dehalococcoidetes;o_Dehalococcoidales;f_Dehalococcoidaceae;g_s_                    | 0.09       | 0.15             | 0.44    | 1.32    | 1.22     | 2.5   |
| p_Planctomycetes;c_Phycisphaerae;o_MSBL9;f_g_s_                                                    | 0.16       | 0.16             | 0.3     | 1.33    | 0.85     | 3.35  |
| p_Proteobacteria;c_Deltaproteobacteria;o_Desulfobacterales;f_Desulfobacteraceae;g_Desulfococcus;s_ | 0.13       | 0.14             | 0.3     | 1.43    | 0.85     | 4.2   |

|                                                                                          |      |      |      |      |      |      |
|------------------------------------------------------------------------------------------|------|------|------|------|------|------|
| p_Bacteroidetes;c_Bacteroidia;o_Bacteroidales;f_g_s_                                     | 0.12 | 0.08 | 0.3  | 1.43 | 0.83 | 5.03 |
| p_Bacteroidetes;c_Cytophagia;o_Cytophagales;f_Flammeovirgaceae;g_s_                      | 0.21 | 0.17 | 0.27 | 1.36 | 0.76 | 5.79 |
| p_Proteobacteria;c_Deltaproteobacteria;o_Desulfobacteriales;f_Desulfobulbaceae;g_s_      | 0.1  | 0.06 | 0.26 | 1.38 | 0.73 | 6.52 |
| p_NC10;c_wb1-A12;o_f_g_s_                                                                | 0.04 | 0.1  | 0.26 | 1.4  | 0.73 | 7.25 |
| p_Proteobacteria;c_Alphaproteobacteria;o_f_g_s_                                          | 0.14 | 0.18 | 0.23 | 1.34 | 0.65 | 7.9  |
| p_Proteobacteria;c_Deltaproteobacteria;o_Desulfobacteriales;f_Desulfobacteraceae;g_s_    | 0.07 | 0.07 | 0.23 | 1.57 | 0.65 | 8.55 |
| p_OP8;c_OP8_1;o_f_g_s_                                                                   | 0.03 | 0.06 | 0.22 | 1.29 | 0.6  | 9.16 |
| p_Proteobacteria;c_Deltaproteobacteria;o_Desulfuromonadales;f_Desulfuromonadaeaceae;g_s_ | 0.09 | 0.07 | 0.19 | 1.36 | 0.55 | 9.7  |

Groups *U-166* & Ewing Bank  
Average dissimilarity = 37.69

| Species                                                                                             | Group <i>U-166</i> | Group Ewing Bank |         |         |          |       |
|-----------------------------------------------------------------------------------------------------|--------------------|------------------|---------|---------|----------|-------|
|                                                                                                     | Av.Abund           | Av.Abund         | Av.Diss | Diss/SD | Contrib% | Cum.% |
| p_Proteobacteria;c_Gammaproteobacteria;o_Thiotrichales;f_Piscirickettsiaceae;g_s_                   | 0.29               | 0.27             | 0.53    | 1.34    | 1.39     | 1.39  |
| p_Chloroflexi;c_Dehalococcoidetes;o_Dehalococcoidales;f_Dehalococcoidaceae;g_s_                     | 0.08               | 0.15             | 0.48    | 1.32    | 1.26     | 2.66  |
| p_Plantomycetes;c_Phycisphaerae;o_MSBL9;f_g_s_                                                      | 0.16               | 0.16             | 0.46    | 1.51    | 1.22     | 3.88  |
| p_Proteobacteria;c_Deltaproteobacteria;o_Desulfobacteriales;f_Desulfobacteraceae;g_Desulfococcus;s_ | 0.11               | 0.14             | 0.37    | 1.44    | 0.99     | 4.87  |
| p_Bacteroidetes;c_Bacteroidia;o_Bacteroidales;f_g_s_                                                | 0.11               | 0.08             | 0.36    | 1.43    | 0.95     | 5.82  |
| p_Proteobacteria;c_Alphaproteobacteria;o_Rhodobacteriales;f_Rhodobacteraceae;g_s_                   | 0.2                | 0.12             | 0.35    | 1.57    | 0.93     | 6.75  |
| p_Actinobacteria;c_OPB41;o_f_g_s_                                                                   | 0.1                | 0.06             | 0.27    | 1.14    | 0.7      | 7.45  |
| p_Proteobacteria;c_Alphaproteobacteria;o_f_g_s_                                                     | 0.19               | 0.18             | 0.26    | 1.4     | 0.68     | 8.13  |
| p_OP8;c_OP8_1;o_f_g_s_                                                                              | 0.01               | 0.06             | 0.24    | 1.2     | 0.63     | 8.76  |
| p_Bacteroidetes;c_Cytophagia;o_Cytophagales;f_Flammeovirgaceae;g_s_                                 | 0.2                | 0.17             | 0.24    | 1.29    | 0.62     | 9.39  |
| p_Proteobacteria;c_Deltaproteobacteria;o_Desulfarculales;f_Desulfarculaceae;g_s_                    | 0.06               | 0.1              | 0.23    | 1.43    | 0.6      | 9.98  |
| p_Proteobacteria;c_Deltaproteobacteria;o_Desulfobacteriales;f_Desulfobacteraceae;g_s_               | 0.05               | 0.07             | 0.22    | 1.67    | 0.59     | 10.57 |

Groups *Halo* & Viosca Knoll  
Average dissimilarity = 31.40

| Species                                                                                             | Group <i>Halo</i> | Group Viosca Knoll |         |         |          |       |
|-----------------------------------------------------------------------------------------------------|-------------------|--------------------|---------|---------|----------|-------|
|                                                                                                     | Av.Abund          | Av.Abund           | Av.Diss | Diss/SD | Contrib% | Cum.% |
| p_Chloroflexi;c_Dehalococcoidetes;o_Dehalococcoidales;f_Dehalococcoidaceae;g_s_                     | 0.14              | 0.08               | 0.35    | 0.95    | 1.13     | 1.13  |
| p_Proteobacteria;c_Gammaproteobacteria;o_Thiotrichales;f_Piscirickettsiaceae;g_s_                   | 0.25              | 0.33               | 0.34    | 1.28    | 1.08     | 2.21  |
| p_Proteobacteria;c_Deltaproteobacteria;o_Desulfobacteriales;f_Desulfobacteraceae;g_Desulfococcus;s_ | 0.14              | 0.18               | 0.22    | 1.53    | 0.71     | 2.92  |
| p_Plantomycetes;c_Phycisphaerae;o_MSBL9;f_g_s_                                                      | 0.11              | 0.15               | 0.22    | 1.77    | 0.7      | 3.61  |
| p_Proteobacteria;c_Deltaproteobacteria;o_f_g_s_                                                     | 0.15              | 0.11               | 0.21    | 1.36    | 0.66     | 4.27  |
| p_Proteobacteria;c_Deltaproteobacteria;o_Desulfuromonadales;f_Desulfuromonadaeaceae;g_s_            | 0.11              | 0.06               | 0.2     | 1.46    | 0.64     | 4.91  |
| p_Lentisphaerae;c_[Lentisphaeria];o_Lentisphaerales;f_g_s_                                          | 0.08              | 0.02               | 0.2     | 1.9     | 0.64     | 5.55  |
| p_Proteobacteria;c_Gammaproteobacteria;o_Oceanospirillales;f_Endozoicimonaceae;g_s_                 | 0.06              | 0                  | 0.18    | 1.33    | 0.58     | 6.14  |
| p_OP8;c_OP8_1;o_f_g_s_                                                                              | 0.07              | 0.03               | 0.18    | 0.95    | 0.57     | 6.71  |
| p_Proteobacteria;c_Deltaproteobacteria;o_Desulfobacteriales;f_Desulfobacteraceae;g_s_               | 0.1               | 0.07               | 0.18    | 1.52    | 0.57     | 7.28  |
| p_Proteobacteria;c_Deltaproteobacteria;o_Desulfobacteriales;f_Desulfobulbaceae;g_s_                 | 0.12              | 0.1                | 0.18    | 1.49    | 0.57     | 7.85  |
| p_Bacteroidetes;c_Bacteroidia;o_Bacteroidales;f_g_s_                                                | 0.11              | 0.13               | 0.17    | 1.45    | 0.55     | 8.4   |
| p_Chloroflexi;c_Dehalococcoidetes;o_f_g_s_                                                          | 0.07              | 0.04               | 0.17    | 1       | 0.55     | 8.95  |

Groups *U-166* & Viosca Knoll  
Average dissimilarity = 34.73

| Species                                                                                             | Group <i>U-166</i> | Group Viosca Knoll |         |         |          |       |
|-----------------------------------------------------------------------------------------------------|--------------------|--------------------|---------|---------|----------|-------|
|                                                                                                     | Av.Abund           | Av.Abund           | Av.Diss | Diss/SD | Contrib% | Cum.% |
| p_Plantomycetes;c_Phycisphaerae;o_MSBL9;f_g_s_                                                      | 0.16               | 0.15               | 0.42    | 2.1     | 1.2      | 1.2   |
| p_Proteobacteria;c_Gammaproteobacteria;o_Thiotrichales;f_Piscirickettsiaceae;g_s_                   | 0.29               | 0.33               | 0.37    | 1.35    | 1.07     | 2.27  |
| p_Proteobacteria;c_Deltaproteobacteria;o_Desulfobacteriales;f_Desulfobacteraceae;g_Desulfococcus;s_ | 0.11               | 0.18               | 0.37    | 1.42    | 1.06     | 3.33  |
| p_Bacteroidetes;c_Bacteroidia;o_Bacteroidales;f_g_s_                                                | 0.11               | 0.13               | 0.35    | 1.8     | 1.02     | 4.35  |
| p_NC10;c_wb1-A12;o_f_g_s_                                                                           | 0.11               | 0.03               | 0.32    | 2.11    | 0.93     | 5.28  |
| p_Chloroflexi;c_Dehalococcoidetes;o_Dehalococcoidales;f_Dehalococcoidaceae;g_s_                     | 0.08               | 0.08               | 0.27    | 1.47    | 0.77     | 6.05  |
| p_Proteobacteria;c_Alphaproteobacteria;o_Rhodobacteriales;f_Rhodobacteraceae;g_s_                   | 0.2                | 0.14               | 0.27    | 1.36    | 0.76     | 6.82  |
| p_Proteobacteria;c_Deltaproteobacteria;o_Myxococcales;f_g_s_                                        | 0.11               | 0.17               | 0.24    | 3.06    | 0.69     | 7.5   |
| p_Acidobacteria;c_OS-K;o_f_g_s_                                                                     | 0.04               | 0.1                | 0.24    | 1.53    | 0.69     | 8.19  |
| p_Proteobacteria;c_Alphaproteobacteria;o_f_g_s_                                                     | 0.19               | 0.17               | 0.24    | 2.01    | 0.68     | 8.87  |
| p_Actinobacteria;c_OPB41;o_f_g_s_                                                                   | 0.1                | 0.06               | 0.23    | 1.13    | 0.66     | 9.53  |
| p_Proteobacteria;c_Deltaproteobacteria;o_Desulfobacteriales;f_Desulfobulbaceae;g_s_                 | 0.06               | 0.1                | 0.2     | 1.54    | 0.59     | 10.12 |

Groups *Anona* & Viosca Knoll  
Average dissimilarity = 29.48

| Species                                                                                             | Group <i>Anona</i> | Group Viosca Knoll |         |         |          |       |
|-----------------------------------------------------------------------------------------------------|--------------------|--------------------|---------|---------|----------|-------|
|                                                                                                     | Av.Abund           | Av.Abund           | Av.Diss | Diss/SD | Contrib% | Cum.% |
| p_Proteobacteria;c_Gammaproteobacteria;o_Thiotrichales;f_Piscirickettsiaceae;g_s_                   | 0.27               | 0.33               | 0.35    | 1.56    | 1.2      | 1.2   |
| p_Proteobacteria;c_Deltaproteobacteria;o_Desulfobacteriales;f_Desulfobacteraceae;g_Desulfococcus;s_ | 0.15               | 0.18               | 0.29    | 1.3     | 1        | 2.2   |
| p_Bacteroidetes;c_Bacteroidia;o_Bacteroidales;f_g_s_                                                | 0.14               | 0.13               | 0.28    | 1.76    | 0.97     | 3.17  |
| p_Proteobacteria;c_Deltaproteobacteria;o_Desulfobacteriales;f_Desulfobulbaceae;g_s_                 | 0.13               | 0.1                | 0.26    | 1.69    | 0.88     | 4.05  |
| p_Plantomycetes;c_Phycisphaerae;o_MSBL9;f_g_s_                                                      | 0.16               | 0.15               | 0.26    | 1.63    | 0.87     | 4.92  |
| p_Chloroflexi;c_Dehalococcoidetes;o_Dehalococcoidales;f_Dehalococcoidaceae;g_s_                     | 0.08               | 0.08               | 0.24    | 1.46    | 0.82     | 5.74  |
| p_Proteobacteria;c_Deltaproteobacteria;o_Desulfobacteriales;f_Desulfobacteraceae;g_s_               | 0.09               | 0.07               | 0.19    | 1.72    | 0.66     | 6.4   |
| p_Proteobacteria;c_Alphaproteobacteria;o_f_g_s_                                                     | 0.17               | 0.17               | 0.17    | 1.82    | 0.59     | 6.99  |
| p_Acidobacteria;c_OS-K;o_f_g_s_                                                                     | 0.08               | 0.1                | 0.17    | 1.5     | 0.59     | 7.58  |
| p_Bacteroidetes;c_Cytophagia;o_Cytophagales;f_Flammeovirgaceae;g_s_                                 | 0.19               | 0.17               | 0.16    | 1.41    | 0.53     | 8.11  |
| p_Proteobacteria;c_Deltaproteobacteria;o_NB1-;f_JTB38;g_s_                                          | 0.13               | 0.11               | 0.16    | 1.33    | 0.53     | 8.64  |
| p_Proteobacteria;c_Deltaproteobacteria;o_Desulfarculales;f_Desulfarculaceae;g_s_                    | 0.08               | 0.09               | 0.15    | 1.47    | 0.51     | 9.15  |
| p_TM6;c_SJA-4;o_f_g_s_                                                                              | 0.1                | 0.06               | 0.14    | 1.16    | 0.48     | 9.64  |
| p_Proteobacteria;c_Deltaproteobacteria;o_Syntrophobacteriales;f_Syntrophobacteraceae;g_s_           | 0.13               | 0.15               | 0.13    | 1.37    | 0.46     | 10.1  |

Groups Ewing Bank & Viosca Knoll

Average dissimilarity = 34.41

| Species                                                                                             | Group Ewing Bank |  | Group Viosca Knoll |  | Av.Diss | Diss/SD | Contrib% | Cum.% |
|-----------------------------------------------------------------------------------------------------|------------------|--|--------------------|--|---------|---------|----------|-------|
|                                                                                                     | Av.Abund         |  | Av.Abund           |  |         |         |          |       |
| p_Proteobacteria;c_Gammaproteobacteria;o_Thiotrichales;f_Piscirickettsiaceae;g_s_                   | 0.27             |  | 0.33               |  | 0.45    | 1.31    | 1.31     | 1.31  |
| p_Chloroflexi;c_Dehalococcoidetes;o_Dehalococcoidales;f_Dehalococcoidaceae;g_s_                     | 0.15             |  | 0.08               |  | 0.43    | 1.32    | 1.25     | 2.56  |
| p_Proteobacteria;c_Deltaproteobacteria;o_Desulfobacteriales;f_Desulfobacteraceae;g_Desulfococcus;s_ | 0.14             |  | 0.18               |  | 0.32    | 1.36    | 0.93     | 3.49  |
| p_Planctomycetes;c_Phycisphaerae;o_MSBL9;f_g_s_                                                     | 0.16             |  | 0.15               |  | 0.28    | 1.32    | 0.82     | 4.31  |
| p_NC10;c_wb1-A12;o_f_g_s_                                                                           | 0.1              |  | 0.03               |  | 0.28    | 1.51    | 0.81     | 5.13  |
| p_Bacteroidetes;c_Bacteroidia;o_Bacteroidales;f_g_s_                                                | 0.08             |  | 0.13               |  | 0.26    | 1.34    | 0.76     | 5.88  |
| p_Proteobacteria;c_Deltaproteobacteria;o_Desulfobacteriales;f_Desulfobulbaceae;g_s_                 | 0.06             |  | 0.1                |  | 0.23    | 1.37    | 0.68     | 6.56  |
| p_Bacteroidetes;c_Cytophagia;o_Cytophagales;f_Flammeovirgaceae;g_s_                                 | 0.17             |  | 0.17               |  | 0.22    | 1.48    | 0.65     | 7.21  |
| p_Proteobacteria;c_Deltaproteobacteria;o_Desulfobacteriales;f_Desulfobacteraceae;g_s_               | 0.07             |  | 0.07               |  | 0.22    | 1.81    | 0.64     | 7.85  |
| p_Acidobacteria;c_OS-K;o_f_g_s_                                                                     | 0.05             |  | 0.1                |  | 0.21    | 1.31    | 0.61     | 8.46  |
| p_OP8;c_OP8_1;o_f_g_s_                                                                              | 0.06             |  | 0.03               |  | 0.21    | 1.32    | 0.61     | 9.08  |
| p_Proteobacteria;c_Deltaproteobacteria;o_Sva0853;f_JTB36;g_s_                                       | 0.09             |  | 0.05               |  | 0.2     | 1.21    | 0.58     | 9.66  |

Groups Halo & Mardi Gras

Average dissimilarity = 40.51

| Species                                                                                             | Group Halo |  | Group Mardi Gras |  | Av.Diss | Diss/SD | Contrib% | Cum.% |
|-----------------------------------------------------------------------------------------------------|------------|--|------------------|--|---------|---------|----------|-------|
|                                                                                                     | Av.Abund   |  | Av.Abund         |  |         |         |          |       |
| p_Proteobacteria;c_Gammaproteobacteria;o_Thiotrichales;f_Piscirickettsiaceae;g_s_                   | 0.25       |  | 0.23             |  | 0.48    | 1.61    | 1.18     | 1.18  |
| p_Planctomycetes;c_Phycisphaerae;o_MSBL9;f_g_s_                                                     | 0.11       |  | 0.2              |  | 0.47    | 1.9     | 1.15     | 2.33  |
| p_Bacteroidetes;c_Bacteroidia;o_Bacteroidales;f_g_s_                                                | 0.11       |  | 0.18             |  | 0.39    | 1.84    | 0.97     | 3.31  |
| p_Chloroflexi;c_Dehalococcoidetes;o_Dehalococcoidales;f_Dehalococcoidaceae;g_s_                     | 0.14       |  | 0.1              |  | 0.39    | 1.01    | 0.97     | 4.28  |
| p_Proteobacteria;c_Deltaproteobacteria;o_Desulfobacteriales;f_Desulfobacteraceae;g_Desulfococcus;s_ | 0.14       |  | 0.19             |  | 0.33    | 1.28    | 0.81     | 5.09  |
| p_Proteobacteria;c_Deltaproteobacteria;o_NB1-j;f_NB1-i;g_s_                                         | 0.16       |  | 0.22             |  | 0.26    | 1.54    | 0.64     | 5.72  |
| p_Lentisphaerae;c_Lentisphaeria;o_Lentisphaerales;f_g_s_                                            | 0.08       |  | 0.01             |  | 0.25    | 2.17    | 0.61     | 6.34  |
| p_Proteobacteria;c_Deltaproteobacteria;o_f_g_s_                                                     | 0.15       |  | 0.1              |  | 0.24    | 1.42    | 0.6      | 6.93  |
| p_Actinobacteria;c_OPB41;o_f_g_s_                                                                   | 0.04       |  | 0.09             |  | 0.24    | 1.22    | 0.59     | 7.53  |
| p_Fusobacteria;c_Fusobacteriia;o_Fusobacteriales;f_Fusobacteriaceae;g_Propionigenium;s_             | 0.07       |  | 0                |  | 0.24    | 2.78    | 0.59     | 8.12  |
| p_Bacteroidetes;c_Cytophagia;o_Cytophagales;f_Flammeovirgaceae;g_s_                                 | 0.15       |  | 0.17             |  | 0.23    | 1.36    | 0.58     | 8.7   |
| p_Proteobacteria;c_Deltaproteobacteria;o_Desulfarculales;f_Desulfarculaceae;g_s_                    | 0.11       |  | 0.1              |  | 0.23    | 1.27    | 0.58     | 9.27  |

Groups Mica & Mardi Gras

Average dissimilarity = 36.63

| Species                                                                                             | Group Mica |  | Group Mardi Gras |  | Av.Diss | Diss/SD | Contrib% | Cum.% |
|-----------------------------------------------------------------------------------------------------|------------|--|------------------|--|---------|---------|----------|-------|
|                                                                                                     | Av.Abund   |  | Av.Abund         |  |         |         |          |       |
| p_Proteobacteria;c_Gammaproteobacteria;o_Thiotrichales;f_Piscirickettsiaceae;g_s_                   | 0.29       |  | 0.23             |  | 0.52    | 1.56    | 1.43     | 1.43  |
| p_Planctomycetes;c_Phycisphaerae;o_MSBL9;f_g_s_                                                     | 0.16       |  | 0.2              |  | 0.4     | 1.57    | 1.08     | 2.52  |
| p_Proteobacteria;c_Deltaproteobacteria;o_Desulfobacteriales;f_Desulfobacteraceae;g_Desulfococcus;s_ | 0.13       |  | 0.19             |  | 0.39    | 1.32    | 1.05     | 3.57  |
| p_Bacteroidetes;c_Bacteroidia;o_Bacteroidales;f_g_s_                                                | 0.12       |  | 0.18             |  | 0.38    | 1.33    | 1.05     | 4.62  |
| p_Chloroflexi;c_Dehalococcoidetes;o_Dehalococcoidales;f_Dehalococcoidaceae;g_s_                     | 0.09       |  | 0.1              |  | 0.3     | 1.15    | 0.82     | 5.44  |
| p_Bacteroidetes;c_Cytophagia;o_Cytophagales;f_Flammeovirgaceae;g_s_                                 | 0.21       |  | 0.17             |  | 0.26    | 1.31    | 0.71     | 6.15  |
| p_Actinobacteria;c_OPB41;o_f_g_s_                                                                   | 0.06       |  | 0.09             |  | 0.25    | 1.34    | 0.67     | 6.82  |
| p_Proteobacteria;c_Deltaproteobacteria;o_Desulfarculales;f_Desulfarculaceae;g_s_                    | 0.07       |  | 0.1              |  | 0.24    | 1.06    | 0.65     | 7.47  |
| p_Proteobacteria;c_Deltaproteobacteria;o_Desulfobacteriales;f_Desulfobulbaceae;g_s_                 | 0.1        |  | 0.12             |  | 0.23    | 1.33    | 0.63     | 8.1   |
| p_Proteobacteria;c_Deltaproteobacteria;o_DTB120;f_g_s_                                              | 0.06       |  | 0                |  | 0.22    | 1.68    | 0.61     | 8.71  |
| p_Proteobacteria;c_Alphaproteobacteria;o_f_g_s_                                                     | 0.14       |  | 0.16             |  | 0.19    | 1.38    | 0.53     | 9.24  |
| p_Proteobacteria;c_Alphaproteobacteria;o_Rhodospirillales;f_Rhodospirillaceae;g_s_                  | 0.11       |  | 0.07             |  | 0.19    | 1.55    | 0.52     | 9.76  |

Groups U-166 & Mardi Gras

Average dissimilarity = 39.28

| Species                                                                                             | Group U-166 |  | Group Mardi Gras |  | Av.Diss | Diss/SD | Contrib% | Cum.% |
|-----------------------------------------------------------------------------------------------------|-------------|--|------------------|--|---------|---------|----------|-------|
|                                                                                                     | Av.Abund    |  | Av.Abund         |  |         |         |          |       |
| p_Proteobacteria;c_Gammaproteobacteria;o_Thiotrichales;f_Piscirickettsiaceae;g_s_                   | 0.29        |  | 0.23             |  | 0.57    | 1.37    | 1.46     | 1.46  |
| p_Planctomycetes;c_Phycisphaerae;o_MSBL9;f_g_s_                                                     | 0.16        |  | 0.2              |  | 0.5     | 1.38    | 1.28     | 2.74  |
| p_Bacteroidetes;c_Bacteroidia;o_Bacteroidales;f_g_s_                                                | 0.11        |  | 0.18             |  | 0.48    | 1.37    | 1.23     | 3.97  |
| p_Proteobacteria;c_Deltaproteobacteria;o_Desulfobacteriales;f_Desulfobacteraceae;g_Desulfococcus;s_ | 0.11        |  | 0.19             |  | 0.48    | 1.32    | 1.21     | 5.18  |
| p_NC10;c_wb1-A12;o_f_g_s_                                                                           | 0.11        |  | 0.02             |  | 0.38    | 2.16    | 0.97     | 6.15  |
| p_Chloroflexi;c_Dehalococcoidetes;o_Dehalococcoidales;f_Dehalococcoidaceae;g_s_                     | 0.08        |  | 0.1              |  | 0.34    | 1.24    | 0.86     | 7.01  |
| p_Actinobacteria;c_OPB41;o_f_g_s_                                                                   | 0.1         |  | 0.09             |  | 0.32    | 1.32    | 0.8      | 7.81  |
| p_Proteobacteria;c_Alphaproteobacteria;o_Rhodobacteriales;f_Rhodobacteraceae;g_s_                   | 0.2         |  | 0.14             |  | 0.29    | 1.32    | 0.75     | 8.56  |
| p_Proteobacteria;c_Deltaproteobacteria;o_Desulfobacteriales;f_Desulfobulbaceae;g_s_                 | 0.06        |  | 0.12             |  | 0.29    | 1.46    | 0.75     | 9.31  |
| p_Proteobacteria;c_Deltaproteobacteria;o_Desulfarculales;f_Desulfarculaceae;g_s_                    | 0.06        |  | 0.1              |  | 0.28    | 1.08    | 0.7      | 10.01 |

Groups Ewing Bank & Mardi Gras

Average dissimilarity = 40.72

| Species                                                                                             | Group Ewing Bank |  | Group Mardi Gras |  | Av.Diss | Diss/SD | Contrib% | Cum.% |
|-----------------------------------------------------------------------------------------------------|------------------|--|------------------|--|---------|---------|----------|-------|
|                                                                                                     | Av.Abund         |  | Av.Abund         |  |         |         |          |       |
| p_Proteobacteria;c_Gammaproteobacteria;o_Thiotrichales;f_Piscirickettsiaceae;g_s_                   | 0.27             |  | 0.23             |  | 0.61    | 1.35    | 1.51     | 1.51  |
| p_Bacteroidetes;c_Bacteroidia;o_Bacteroidales;f_g_s_                                                | 0.08             |  | 0.18             |  | 0.49    | 1.58    | 1.21     | 2.71  |
| p_Chloroflexi;c_Dehalococcoidetes;o_Dehalococcoidales;f_Dehalococcoidaceae;g_s_                     | 0.15             |  | 0.1              |  | 0.46    | 1.32    | 1.14     | 3.85  |
| p_Planctomycetes;c_Phycisphaerae;o_MSBL9;f_g_s_                                                     | 0.16             |  | 0.2              |  | 0.43    | 1.33    | 1.07     | 4.92  |
| p_Proteobacteria;c_Deltaproteobacteria;o_Desulfobacteriales;f_Desulfobacteraceae;g_Desulfococcus;s_ | 0.14             |  | 0.19             |  | 0.42    | 1.3     | 1.04     | 5.96  |
| p_NC10;c_wb1-A12;o_f_g_s_                                                                           | 0.1              |  | 0.02             |  | 0.33    | 1.61    | 0.82     | 6.78  |
| p_Proteobacteria;c_Deltaproteobacteria;o_Desulfobacteriales;f_Desulfobulbaceae;g_s_                 | 0.06             |  | 0.12             |  | 0.33    | 1.41    | 0.8      | 7.58  |
| p_Bacteroidetes;c_Cytophagia;o_Cytophagales;f_Flammeovirgaceae;g_s_                                 | 0.17             |  | 0.17             |  | 0.28    | 1.3     | 0.69     | 8.27  |
| p_Actinobacteria;c_OPB41;o_f_g_s_                                                                   | 0.06             |  | 0.09             |  | 0.27    | 1.36    | 0.67     | 8.94  |
| p_Proteobacteria;c_Deltaproteobacteria;o_Desulfarculales;f_Desulfarculaceae;g_s_                    | 0.1              |  | 0.1              |  | 0.26    | 1.24    | 0.65     | 9.59  |
| p_Chloroflexi;c_S085;o_f_g_s_                                                                       | 0.11             |  | 0.04             |  | 0.26    | 1.43    | 0.63     | 10.22 |

Groups Viosca Knoll & Mardi Gras

Average dissimilarity = 35.18

| Species                                                                                            | Group Viosca Knoll | Group Mardi Gras | Av.Diss | Diss/SD | Contrib% | Cum.% |
|----------------------------------------------------------------------------------------------------|--------------------|------------------|---------|---------|----------|-------|
|                                                                                                    | Av.Abund           | Av.Abund         |         |         |          |       |
| p_Proteobacteria;c_Gammaproteobacteria;o_Thiotrichales;f_Piscirickettsiaceae;g_s_                  | 0.33               | 0.23             | 0.57    | 1.54    | 1.61     | 1.61  |
| p_Planctomycetes;c_Phycisphaerae;o_MSBL9;f_g_s_                                                    | 0.15               | 0.2              | 0.39    | 1.72    | 1.12     | 2.73  |
| p_Bacteroidetes;c_Bacteroidia;o_Bacteroidales;f_g_s_                                               | 0.13               | 0.18             | 0.36    | 1.51    | 1.04     | 3.76  |
| p_Proteobacteria;c_Deltaproteobacteria;o_Desulfobacterales;f_Desulfobacteraceae;g_Desulfococcus;s_ | 0.18               | 0.19             | 0.35    | 1.35    | 0.99     | 4.76  |
| p_Chloroflexi;c_Dehalococcoidetes;o_Dehalococcoidales;f_Dehalococcoidaceae;g_s_                    | 0.08               | 0.1              | 0.28    | 1.13    | 0.79     | 5.55  |
| p_Actinobacteria;c_OPB41;o_f_g_s_                                                                  | 0.06               | 0.09             | 0.24    | 1.38    | 0.67     | 6.22  |
| p_Proteobacteria;c_Deltaproteobacteria;o_Desulfarculales;f_Desulfarculaceae;g_s_                   | 0.09               | 0.1              | 0.22    | 1.13    | 0.64     | 6.86  |
| p_Proteobacteria;c_Deltaproteobacteria;o_Desulfobacterales;f_Desulfobulbaceae;g_s_                 | 0.1                | 0.12             | 0.2     | 1.34    | 0.58     | 7.43  |
| p_Bacteroidetes;c_Cytophagia;o_Cytophagales;f_Flammeovirgaceae;g_s_                                | 0.17               | 0.17             | 0.2     | 1.26    | 0.57     | 8.01  |
| p_Proteobacteria;c_Gammaproteobacteria;o_Chromatiales;f_g_s_                                       | 0.13               | 0.1              | 0.18    | 1.83    | 0.52     | 8.53  |
| p_Planctomycetes;c_Brocadiaceae;o_Brocadiales;f_Brocadiaceae;g_Candidatus Scalindua;s_             | 0.08               | 0.05             | 0.18    | 1.82    | 0.5      | 9.02  |
| p_Chloroflexi;c_Dehalococcoidetes;o_f_g_s_                                                         | 0.04               | 0.07             | 0.18    | 1.31    | 0.5      | 9.52  |

**Table S3. Similarity Percent (SIMPER) analysis, identifying archaeal drivers of within group similarity, and between group dissimilarity.**

Group *Halo*

Average similarity: 70.69

| Species                                                                               | Av.Abund | Av.Sim | Sim/SD | Contrib% | Cum.% |
|---------------------------------------------------------------------------------------|----------|--------|--------|----------|-------|
| p_Crenarchaeota;c_Thaumarchaeota;o_Cenarchaeales;f_Cenarchaeaceae;g_Nitrosopumilus;s_ | 0.64     | 16.78  | 1.88   | 23.74    | 23.74 |

Group *Mica*

Average similarity: 74.44

| Species                                                                               | Av.Abund | Av.Sim | Sim/SD | Contrib% | Cum.% |
|---------------------------------------------------------------------------------------|----------|--------|--------|----------|-------|
| p_Crenarchaeota;c_Thaumarchaeota;o_Cenarchaeales;f_Cenarchaeaceae;g_Nitrosopumilus;s_ | 0.74     | 23.72  | 2.76   | 31.87    | 31.87 |

Group *U-166*

Average similarity: 64.57

| Species                                                                               | Av.Abund | Av.Sim | Sim/SD | Contrib% | Cum.% |
|---------------------------------------------------------------------------------------|----------|--------|--------|----------|-------|
| p_Crenarchaeota;c_Thaumarchaeota;o_Cenarchaeales;f_Cenarchaeaceae;g_Nitrosopumilus;s_ | 0.68     | 21.98  | 1.62   | 34.04    | 34.04 |

Group *Anona*

Average similarity: 67.07

| Species                                                                               | Av.Abund | Av.Sim | Sim/SD | Contrib% | Cum.% |
|---------------------------------------------------------------------------------------|----------|--------|--------|----------|-------|
| p_Crenarchaeota;c_Thaumarchaeota;o_Cenarchaeales;f_Cenarchaeaceae;g_Nitrosopumilus;s_ | 0.7      | 20.16  | 2.1    | 30.05    | 30.05 |

Group Ewing Bank

Average similarity: 69.01

| Species                                                                               | Av.Abund | Av.Sim | Sim/SD | Contrib% | Cum.% |
|---------------------------------------------------------------------------------------|----------|--------|--------|----------|-------|
| p_Crenarchaeota;c_Thaumarchaeota;o_Cenarchaeales;f_Cenarchaeaceae;g_Nitrosopumilus;s_ | 0.65     | 19.57  | 2.29   | 28.35    | 28.35 |

Group Viosca Knoll

Average similarity: 77.82

| Species                                                                               | Av.Abund | Av.Sim | Sim/SD | Contrib% | Cum.% |
|---------------------------------------------------------------------------------------|----------|--------|--------|----------|-------|
| p_Crenarchaeota;c_Thaumarchaeota;o_Cenarchaeales;f_Cenarchaeaceae;g_Nitrosopumilus;s_ | 0.78     | 25.52  | 3.35   | 32.8     | 32.8  |

Group Mardi Gras

Average similarity: 58.83

| Species                                                                               | Av.Abund | Av.Sim | Sim/SD | Contrib% | Cum.% |
|---------------------------------------------------------------------------------------|----------|--------|--------|----------|-------|
| p_Crenarchaeota;c_Thaumarchaeota;o_Cenarchaeales;f_Cenarchaeaceae;g_Nitrosopumilus;s_ | 0.57     | 14.32  | 1.36   | 24.34    | 24.34 |

Groups *Halo* & *Mica*

Average dissimilarity = 35.56

| Species                              | Group Halo | Group Mica |         | Diss/SD | Contrib% | Cum.% |
|--------------------------------------|------------|------------|---------|---------|----------|-------|
|                                      | Av.Abund   | Av.Abund   | Av.Diss |         |          |       |
| p_Crenarchaeota;c_MCG;o_:_f_:_g_:_s_ | 0.4        | 0.22       | 4.39    | 1.4     | 12.35    | 12.35 |

Groups *Halo* & *U-166*

Average dissimilarity = 43.24

| Species                              | Group Halo | Group U-166 |         | Diss/SD | Contrib% | Cum.% |
|--------------------------------------|------------|-------------|---------|---------|----------|-------|
|                                      | Av.Abund   | Av.Abund    | Av.Diss |         |          |       |
| p_Crenarchaeota;c_MCG;o_:_f_:_g_:_s_ | 0.4        | 0.17        | 5.12    | 1.41    | 11.84    | 11.84 |

Groups *Mica* & *Anona*

Average dissimilarity = 28.42

| Species                              | Group Mica | Group Anona |         | Diss/SD | Contrib% | Cum.% |
|--------------------------------------|------------|-------------|---------|---------|----------|-------|
|                                      | Av.Abund   | Av.Abund    | Av.Diss |         |          |       |
| p_Crenarchaeota;c_MCG;o_:_f_:_g_:_s_ | 0.22       | 0.28        | 3.74    | 1.48    | 13.18    | 13.18 |

Groups *Halo* & Ewing Bank

Average dissimilarity = 36.28

| Species                              | Group Halo | Group Ewing Bank |         | Diss/SD | Contrib% | Cum.% |
|--------------------------------------|------------|------------------|---------|---------|----------|-------|
|                                      | Av.Abund   | Av.Abu           | Av.Diss |         |          |       |
| p_Crenarchaeota;c_MCG;o_:_f_:_g_:_s_ | 0.4        | 0.26             | 4.38    | 1.37    | 12.08    | 12.08 |

Groups *Halo* & Mardi Gras

Average dissimilarity = 43.89

| Species                                                                               | Group Halo | Group Mardi Gras |         | Diss/SD | Contrib% | Cum.% |
|---------------------------------------------------------------------------------------|------------|------------------|---------|---------|----------|-------|
|                                                                                       | Av.Abund   | Av.Abu           | Av.Diss |         |          |       |
| p_Crenarchaeota;c_Thaumarchaeota;o_Cenarchaeales;f_Cenarchaeaceae;g_Nitrosopumilus;s_ | 0.64       | 0.57             | 5.01    | 1.4     | 11.42    | 11.42 |

Groups *Mica* & Mardi Gras



Average dissimilarity = 38.07

| Species                                                                               | Group Mica |          | Group Mardi Gras |         | Diss/SD | Contrib% | Cum.% |
|---------------------------------------------------------------------------------------|------------|----------|------------------|---------|---------|----------|-------|
|                                                                                       | Av.Abund   | Av.Abund | Av.Abund         | Av.Diss |         |          |       |
| p_Crenarchaeota;c_Thaumarchaeota;o_Cenarchaeales;f_Cenarchaeaceae;g_Nitrosopumilus;s_ | 0.74       | 0.57     | 0.57             | 5.03    | 1.4     | 13.22    | 13.22 |

Groups U-166 & Mardi Gras

Average dissimilarity = 44.81

| Species                                                                               | Group U-166 |          | Group Mardi Gras |         | Diss/SD | Contrib% | Cum.% |
|---------------------------------------------------------------------------------------|-------------|----------|------------------|---------|---------|----------|-------|
|                                                                                       | Av.Abund    | Av.Abund | Av.Abund         | Av.Diss |         |          |       |
| p_Crenarchaeota;c_Thaumarchaeota;o_Cenarchaeales;f_Cenarchaeaceae;g_Nitrosopumilus;s_ | 0.68        | 0.57     | 0.57             | 5.25    | 1.28    | 11.71    | 11.71 |

Groups Ewing Bank & Mardi Gras

Average dissimilarity = 41.78

| Species                                                                               | Group Ewing |          | Group Mardi Gras |         | Diss/SD | Contrib% | Cum.% |
|---------------------------------------------------------------------------------------|-------------|----------|------------------|---------|---------|----------|-------|
|                                                                                       | Av.Abund    | Av.Abund | Av.Abund         | Av.Diss |         |          |       |
| p_Crenarchaeota;c_Thaumarchaeota;o_Cenarchaeales;f_Cenarchaeaceae;g_Nitrosopumilus;s_ | 0.65        | 0.57     | 0.57             | 4.71    | 1.43    | 11.27    | 11.27 |

Groups Viosca Knoll & Mardi Gras

Average dissimilarity = 36.51

| Species                                                                               | Group Viosc |          | Group Mardi Gras |         | Diss/SD | Contrib% | Cum.% |
|---------------------------------------------------------------------------------------|-------------|----------|------------------|---------|---------|----------|-------|
|                                                                                       | Av.Abund    | Av.Abund | Av.Abund         | Av.Diss |         |          |       |
| p_Crenarchaeota;c_Thaumarchaeota;o_Cenarchaeales;f_Cenarchaeaceae;g_Nitrosopumilus;s_ | 0.78        | 0.57     | 0.57             | 5.15    | 1.41    | 14.1     | 14.1  |
